1 **Stratified computational meta-analysis of 2213 acute myeloid leukemia**  
2 **patients reveals age- and sex-dependent gene expression signatures**

3 Raeuf Roushangar <sup>1,2</sup>, George I. Mias <sup>1,2\*</sup>

4 <sup>1</sup> Department of Biochemistry and Molecular Biology,

5 <sup>2</sup> Institute for Quantitative Health Science and Engineering,

6 Michigan State University, East Lansing MI 48824, USA

7

8 \*Corresponding author

9 E-mail: [gmias@msu.edu](mailto:gmias@msu.edu) (GM)

10

11 In 2018 alone, an estimated 20,000 new acute myeloid leukemia (AML) patients  
12 were diagnosed, in the United States, and over 10,000 of them are expected to  
13 die from the disease. AML is primarily diagnosed among the elderly (median 68  
14 years old at diagnosis). Prognoses have significantly improved for younger  
15 patients, but in patients older than 60 years old as much as 70% of patients will  
16 die within a year of diagnosis. In this study, we conducted stratified  
17 computational meta-analysis of 2,213 acute myeloid leukemia patients compared  
18 to 548 healthy individuals, using curated publicly available data. We carried out  
19 analysis of variance of normalized batch corrected data, including considerations  
20 for disease, age, tissue and sex. We identified 974 differentially expressed probe  
21 sets and 4 significant pathways associated with AML. Additionally, we identified  
22 70 sex- and 375 age-related probe set expression signatures relevant to AML.  
23 Finally, we used a machine learning model (KNN model) to classify AML patients

24 compared to healthy individuals with 90+% achieved accuracy. Overall our  
25 findings provide a new reanalysis of public datasets, that enabled the  
26 identification of potential new gene sets relevant to AML that can potentially be  
27 used in future experiments and possible stratified disease diagnostics.

28

29

30

## 31 **INTRODUCTION**

32 Acute myeloid leukemia (AML) is a heterogeneous malignant disease of the  
33 hematopoietic system myeloid cell lineage. AML is best characterized by the  
34 terminal differentiation in normal blood cells and excessive production and  
35 release of cells at various stages of incomplete maturation (leukemia cells). As a  
36 result of this faster than normal and uncontrolled growth of leukemia cells,  
37 healthy myeloid precursors involved in hematopoiesis are suppressed, and  
38 ultimately, can soar to death within months from diagnosis if untreated<sup>1,2</sup>. AML  
39 accounts for 70% of myeloid leukemia and nearly 80% of acute leukemia cases,  
40 making it the most common form of both myeloid and acute leukemia<sup>2,3</sup>. The  
41 number of new AML cases is increasing each year – in 2018 alone, there have  
42 been an estimated about 20,000 new diagnosed AML patients, over 10,000 of  
43 them will die from the disease<sup>4</sup>.

44

45 According to the 2016 World Health Organization (WHO) newly revised myeloid  
46 neoplasms and acute leukemia classification system<sup>5</sup>, AML prognosis criteria for

47 classification is highly dependent on the presence of chromosomal abnormalities,  
48 including chromosomal deletions, duplications, translocations, inversions, and  
49 gene fusion. Mostly, AML is diagnosed through microscopic, cytogenetics, and  
50 molecular genetic analyses of patients' blood and/or bone marrow samples.  
51 Microscopic examination is used to detect distinctive features (e.g. Auer rods) in  
52 cell morphology, cytogenetic analysis to identify chromosomal structural  
53 aberrations (e.g., t(8;21), inv(16), t(16;16), or t(9;11)), and molecular genetic  
54 analysis to identify gene fusion (e.g., RUNX1-RUNX1T1 and CBFB-MYH11), and  
55 mutations in genes frequently mutated in AML (e.g., NPM1, CEBPA, RUNX1,  
56 FLT3)<sup>6-8</sup>. These cytogenetic and molecular genetic analyses are used to identify  
57 prognosis markers that can be used to classify AML patients into three risk  
58 categories: favorable, intermediate, and unfavorable. The largest group of AML  
59 patients (almost 50%) however, present normal karyotype and lack genetic  
60 abnormalities<sup>7-10</sup>. These patients are classified as intermediate risk, and often  
61 have heterogeneous clinical outcome with standard therapy with risk of AML  
62 relapse<sup>11</sup>.

63

64 Additionally, AML prognosis worsens as age increases, and older patients  
65 respond less to current treatments with poorer clinical outcomes than their  
66 younger counterparts<sup>12,13</sup>. AML can occur in people of all ages but is primarily  
67 diagnosed among the elderly (>60 years), with a median age of 68 year at  
68 diagnosis<sup>4</sup>. Recent advances in AML biology expanded our understanding of its  
69 complex genetic landscape and led to significant improvement in prognoses and

70 therapeutic strategy for younger patients<sup>13,14</sup>. However, in patients older than 60  
71 years old, prognoses remain grim and therapeutic strategy has been nearly the  
72 same for more than 30 years<sup>2,6,13-15</sup>. Approximately 70% of AML patients 65  
73 years of age or older die within a year following diagnosis<sup>16</sup>. While it is apparent  
74 that the nature of AML changes with age, still little is known about the extent of  
75 these associations and how they vary with patient's age<sup>14,17,18</sup>. Taking into  
76 consideration age considerations in the identification of changes in AML global  
77 gene expression can lead to improved early diagnosis and improvement in  
78 treatment approaches for elderly patients. Further complicating, AML has  
79 multiple driver mutations and competing clones that evolve over time, making it a  
80 very dynamic disease<sup>19,20</sup>

81

82 Multiple gene expression analyses of AML have been carried out, 25 of which  
83 these have been systematically compared by Miller and Stamatoyannopoulos<sup>21</sup>,  
84 who analyzed information on 4918 genes, and identified 25 genes reported  
85 across multiple, with potential prognostic features. In this study, we performed  
86 comprehensive gene expression meta-analysis of 2213 acute myeloid leukemia  
87 patients and 548 healthy subjects using 34 publicly available gene expression  
88 microarray datasets (following strict inclusion criteria) to identify disease, sex-  
89 and age-related gene expression changes associated with AML. We identified  
90 sex- and age-related gene expression signatures that show similar alteration in  
91 gene expression levels and associated signaling pathways in AML and have  
92 used our results (gene sets) to predict AML or healthy status. We believe that our

93 results may lead to improved AML early detection and diagnostic testing with  
94 target genes, which collectively can potentially serve as sex- and age-dependent  
95 biomarkers for AML prognosis compared to healthy, as well as the identification  
96 of new treatment targets with mechanisms of action different from those used in  
97 conventional chemotherapy

98

## 99 **RESULTS**

### 100 **Data curation and gene expression preprocessing.**

101 We searched the Gene Expression Omnibus (GEO) public repository, based on  
102 our systematic workflow and inclusion criteria, Fig. 1a-b. Overall, 2,132 datasets  
103 were screened, 643 selected (577 were excluded as non-Affymetrix, various  
104 platform arrays). From the 66 remaining, 34 studies were excluded due to lack of  
105 metadata, non-peripheral blood and non-bone marrow tissues, cell line or cell-  
106 type specific, treated subjects). After this curation we obtained 34 age-annotated  
107 gene expression datasets from 32 different studies covering 2,213 AML patients  
108 and 548 healthy individuals. The sets were re-analyzed, starting from raw data,  
109 to perform a gene expression analysis of variance and functional pathway  
110 enrichment analysis (see online Methods). Table 1 provides a description on  
111 each dataset with a sub-table summary of all curated data used in our current  
112 study. After pre-processing each individual data set separately, Fig. 1b, we  
113 performed the statistical analysis on 44,754 probe sets which were common  
114 across all samples (Affymetrix expression array data).

115

116 **Classification of missing metadata annotation.**

117 Following the data curation step, 805 arrays (802 AML and 3 healthy) of 2,761  
118 curated data were found to be missing sex annotation, and 737 arrays (all AML  
119 patients) were missing information regarding the sample source (i.e. tissue,  
120 either bone marrow [BM] or peripheral blood [PB] annotation). To predict the  
121 missing sex and sample source meta-data, we trained and validated various  
122 machine learning supervised models, including logistic regression (LR)  
123 classification models. The prediction of missing annotations for these arrays was  
124 essential in our study, to increase the sample size, and statistical power<sup>22</sup>. The  
125 models were trained and verified using our annotated preprocessed expression  
126 data. Model training, parameters used in training, validation for this analysis are  
127 discussed in the Methods. Results from model training and predictions, including  
128 confusion matrix, model accuracy, and error can be viewed in Supplementary  
129 Table S1 online and results from classification for missing annotation are  
130 presented in Supplementary files 1 and 2 for sample source and sex annotations  
131 respectively.

132

133 **Batch correction**

134 Our pre-processed data, AML and healthy, were processed using a “dataset-  
135 wise” batch effect correction approach. The datasets used in this study did not  
136 include within-study healthy controls, which would limit analysis of variance, and  
137 particularly the ability to separate biological from batch effects. To address this,  
138 we implemented an iterative batch effect correction approach, essentially

139 employing a weight-based method for correcting batch effects. Assuming the  
140 batch effects due to each data set is a function of the number of samples in the  
141 data set (weight), normalizing sets of unevenly sized datasets may lead to  
142 unbalanced batch correction. We used 5 additional datasets as a reference set,  
143 which we refer to as “covariate” hereafter. Each of the covariate reference  
144 datasets included within study healthy controls. All 5 datasets together consisted  
145 of a total 613 arrays (455 AML and 158 healthy) (Table 2), and pre-processed  
146 exactly as our curated data sets. These were used together with each of the  
147 remaining datasets to batch correct each dataset with respect the covariate  
148 reference using ComBat<sup>23</sup>. After this dataset-wise correction, the 5 covariate  
149 reference datasets were removed, and our expression data were clustered using  
150 principal component analysis (PCA) to visually examine the effect of covariate  
151 reference datasets on distributing the batch weight during batch correction. The  
152 batch effect correction results were then compared to clustering results prior to  
153 batch effect correction (Supplementary Fig. 1)

154

## 155 **Analysis 1: Gene expression meta-analysis and enrichment analysis of** 156 **AML disease state compared to healthy individuals**

157

### 158 **Gene expression meta-analysis of AML disease state.**

159 Following batch correction, we performed an analysis of differential expression  
160 (DE) on 34 data sets including 2213 AML patients and 548 healthy controls.  
161 Analysis of Variance (ANOVA)<sup>24-26</sup> was performed according to a linear model

162 (see method section **Meta-analysis**), including factors for age, sample source (  
163 adjust for differences in tissue between AML and healthy), and sex, as well as  
164 binary interactions thereof. In the analysis we used probe sets to avoid  
165 assumptions on averaging over multiple probe sets corresponding the same  
166 gene symbol. 974 Statistically significant differentially expressed probe sets  
167 (DEPS) (with genes corresponding to 964 unique gene symbols) for AML versus  
168 healthy were selected based on a Bonferroni<sup>27</sup> adjusted p-value < 0.01  
169 (accounting for multiple hypothesis testing), in conjunction with a two-tailed 5%  
170 quantile selection<sup>28</sup> based on the mean difference distribution between AML-  
171 healthy group comparisons (post-hoc analyses using Tukey's Honestly  
172 Significant Difference (HSD). The heatmap (Fig. 2a) shows the hierarchical  
173 clustering of gene expression from the 974 DEPS, including 487 up- and 487  
174 down-regulated with respect to AML as compared to healthy. From this analysis,  
175 WT1 (Wilms tumor 1) with mean difference of 0.26 and adjusted p-value <  
176  $4.11 \times 10^{-11}$  was the most DE up-regulated gene while CRISP3 (cysteine-rich  
177 secretory protein 3) with mean difference of -0.52 and adjusted p-value <  
178  $4.11 \times 10^{-11}$  was the least DE gene. Figure 2b shows the top 10 up- and down-  
179 regulated DEPS with corresponding gene symbols, that resulted from this  
180 analysis (also listed in Table 2, including mean difference and Bonferroni p-  
181 adjusted values from post-hoc analysis using Tukey's HSD tests). The entire list  
182 of all 974 DEPS can be found as Supplementary Table S2 online.

183

184



185 **(ii) Gene enrichment analysis AML disease state DEPS.**

186 To identify signaling pathways associated DEPS in AML, gene enrichment  
187 analysis was performed on all 974 DEPS combined. Pathway over-  
188 representation analysis in Kyoto Encyclopedia of Genes and Genomes  
189 (KEGG)<sup>29-31</sup> signaling pathways, and Gene Ontology (GO) term<sup>32,33</sup> were carried  
190 out using the Database for Annotation, Visualization and Integrated Discovery  
191 (DAVID)<sup>34,35</sup>. Four KEGG signaling pathways were identified as enriched  
192 (Benjamini and Hochberg<sup>36</sup> adjusted p-value < 0.05), including Hematopoietic  
193 cell lineage, Cell cycle, p53 signaling pathway, and Transcriptional  
194 misregulation in cancer. The 4 KEGG signaling pathways are summarized in  
195 Table 3 (see also Supplementary Fig. 2a-d), including unadjusted p-values and  
196 Benjamini and Hochberg<sup>36</sup> adjusted p-values. 56 DEPS including 27 up- and 29  
197 down-regulated (Fig. 2c) were associated these signaling pathways, and the  
198 heatmap of their mean differences is shown in Fig. 2d. From our gene  
199 enrichment analysis for overrepresented biological GO terms, 21 GO terms were  
200 statistically significant with 727 DE unique identities (335 up- and 392 down-  
201 regulated). GO terms included protein and microtubule binding for the molecular  
202 function (MF) category, inflammatory and immune responses, mitotic nuclear  
203 division, and cell proliferation response for the biological process (BP) category,  
204 and finally, cytoplasm, extracellular exosome, cytosol, extracellular space,  
205 integral component of plasma membrane immune response, and others, for the  
206 cellular component (CC) category (Fig. 2e). The entire list of our enrichment

207 analysis results (statistically significant over-representation in KEGG and GO  
208 terms) can be found as Supplementary Table S3 online.

209

210 **Analysis 2. Gene expression meta-analysis and enrichment analysis of sex-**  
211 **and age-related DEPS in AML.**

212 Further analysis of gene expression and pathways enrichment were conducted in  
213 order to characterize sex- and age-specific gene expression changes in AML  
214 patients compared to healthy individuals, (i) **Analysis 2a: “Sex-relevance**  
215 **differential gene expression meta-analysis and associated signaling**  
216 **pathways in AML”**, and (ii) **Analysis 2b: “Age-dependent differential gene**  
217 **expression meta-analysis and associated signaling pathways in AML”**. We  
218 used the same filtering criteria in both analyses as those used in analysis 1 for  
219 significant DEPS and signaling pathways between AML patients and healthy  
220 controls. In addition, DEPS were regarded as statistically significantly (up- or  
221 down-regulated) for each factor, sex and age, if they displayed Bonferroni  
222 adjusted p-value from Tukey’s HSD  $< 2.2 \times 10^{-7}$  ( $=0.01/44,754$  probe sets tested).

223

224 **Analysis 2a. Sex-relevance differential gene expression meta-analysis and**  
225 **associated signaling pathways in AML.**

226 Gene expression meta-analysis was also used to identify DEPS that show sex  
227 differences between male AML patients as compared to female AML patients.  
228 266 DEPS were regarded statistically significant ( $p$ -value  $< 2.2 \times 10^{-7}$ ). A list of all  
229 266 DEPS (including whether higher in either males or females, gene title and

230 symbol, male-female mean difference, and Bonferroni corrected p-value) can be  
231 found as Supplementary Table S3 online. 70 DEPS were found to overlap  
232 between analysis 1 (AML disease state) and analysis 2 (Sex-relevance in AML).  
233 Figure 3a shows these 70 DEPS with gene symbol annotations, and their mean  
234 difference values in the heatmap, which displays differences in significance for a  
235 common DEPS in both analyses 1 and 2. Figure 3b shows the hierarchical  
236 clustering of the 70 DEPS (rows) on sex and disease state of all 2,213 AML and  
237 548 healthy subjects (columns) indicated by color bars above the heatmap. The  
238 top 10 DEPS higher in either males or females from this analysis are shown in  
239 Figure 3c.

240

241 For enrichment analysis, we searched for common intersections in KEGG  
242 pathways and GO terms between the sex meta-analysis and the 974 DE probe  
243 sets from disease state in AML meta-analysis. Sex-relevant DEPS were found in  
244 3 different signaling pathways, including, genes higher expressed in males FLT3  
245 and CD34 in Hematopoietic cell lineage, FLT3 in Transcriptional misregulation in  
246 cancer 1, and PMAIP1 in p53 signaling pathway 1, and MS4A1 was higher in  
247 females and found in Hematopoietic cell lineage pathway (Table 3). Figure 3d  
248 shows GO analysis results, where 15 overrepresented biological GO terms were  
249 overlapped, including terms for extracellular space, immune response, protein  
250 binding, spindle, and midbody. The entire list of our enrichment analysis  
251 (statistically significant KEGG and GO terms) can be found as Supplementary  
252 Table S4.

253

254 **Analysis 2b. Age-dependent differential gene expression meta-analysis and**  
255 **associated signaling pathways in AML.**

256 The subjects were binned in 8 age-groups: 0-19, 20-29, 30-39, 40-49, 50-59, 60-  
257 69, 70-79, and 80-100 years old. From this meta-analysis, 1395 unique probe  
258 sets across all age-groups were identified as statistically significant (Bonferroni  
259 adjusted p-value <  $2.2 \times 10^{-7}$ ) (Supplementary Table S5). From these 375 unique  
260 DEPS (372 unique gene symbols) were found to overlap with the 974 DEPS  
261 probe sets from our AML disease state meta-analysis, accounting for an overall  
262 1400 binary comparisons between the multiple age groups deemed statistically  
263 significant, based on Tukey HSD tests between age-group pairs. The entire list of  
264 1400 identified pairwise differences between age groups and associated probe  
265 set/gene information can be found as Supplementary Table S6 online. The top  
266 10 up- and down- regulated DEPS (labeled with gene symbols) from this analysis  
267 are shown in Fig. 4a. Additionally, Fig. 4b shows 75 DEPS with gene symbols  
268 identified to have appeared specifically in one age-group comparison. Utilizing  
269 results for KEGG analysis for signaling pathways from analysis 1, Fig. 4c shows  
270 17 DE genes identified in all 4 KEGG pathways according to age groups (see  
271 also Table 4).

272

273 To investigate further the progression with age, pairwise correlations between  
274 age-groups were computed. The 0-19 age-group was used as a common  
275 comparison reference with respect to other groups. Using this 0-19 group as a

276 baseline, Figure 4d shows the mean difference of 25 DEPS with respect to the 0-  
277 19 baseline across all other groups. The mean difference values between AML  
278 and healthy are shown in the right-most column of Fig. 4a, b and d for reference.

279

### 280 **AML Classification Machine Learning Model**

281 We used the 974 DEPS to train a k-nearest neighbor (KNN) algorithm in  
282 ClassificalO<sup>37</sup>. All 34 datasets (16 AML and 18 healthy) were used for training,  
283 and testing was done on all 5 covariate reference datasets, include AML and  
284 healthy subjects. The KNN algorithm trained was 98% accurate, and >90%  
285 accurate in testing results (see online Methods for parameters and also details in  
286 Supplementary File 3).

287

### 288 **DISCUSSION**

289 In the present study, we aimed to establish, disease sex-linked and age-  
290 dependent biomarkers from genes with similar changes in gene expression  
291 levels and associated signaling pathways relevant to AML. Utilizing microarray  
292 gene expression data and combined with various machine learning models,  
293 respectively, our biomarkers were indicative of prognostic signature for AML  
294 prediction compared to healthy with 90+% achieved accuracy. We re-analyzed  
295 data aggregated from our curation of 34 publicly available microarray gene  
296 expression datasets covering 2213 AML patients and 548 healthy individuals to  
297 identify changes in AML gene expression associated with disease state (AML

298 compared to healthy), sex-linked (male compared to female), and age-dependent  
299 (across age-groups compared to baseline).

300 We performed 3 differential probe set (gene) expression and gene enrichment  
301 analyses, as discussed below. We note here that our study identified multiple  
302 potentially significant DEPS, with age and sex related differences associated with  
303 AML. While our findings may generate further hypothesis-driven investigations,  
304 we need to also identify the study's limitations: primarily the analysis of AML and  
305 healthy subjects involved bone-marrow and blood samples respectively in each  
306 disease group. We tried to account for this utilizing tissue as an effect in our  
307 linear model, and including multiple interactions. Other limitations include an  
308 unbalanced AML/healthy ratio, as well as the lack of in-study healthy controls. To  
309 address these we attempted to account for batch effects using a dataset-wise  
310 iterative batch correction transformation, as discussed in the methods. Finally,  
311 we also included binary interactions between the factors in the analysis to  
312 account for interaction-related confounding effects.

313

314 *i) Analysis 1: Gene expression meta-analysis and associated signaling*  
315 *pathways of AML disease state compared to healthy individuals*, was carried out  
316 to identify DEPS in AML disease state. The results from this analysis were then  
317 used as baseline indicator for AML disease state. 974 DEPS (487 up- and 487  
318 down-regulated) were identified as significantly differentially expressed between  
319 AML patients and healthy individuals (Bonferroni adjusted p-value < 0.01).  
320 Among these 6 genes are known to be involved in AML functional pathways,

321 including 4 up-regulated, JUP, CCNA1, FLT3, PIK3R1, and 2 down-regulated,  
322 CD14, CEBPE. The top 10 up- and down-regulated genes from this analysis are  
323 listed in Table 2 with their respected Tukey's HSD mean difference and  
324 Bonferroni p-adjusted values. As shown in Figure 2b of the top 10 up- and down-  
325 regulated DEPS and corresponding gene annotations -- WT1 (Wilms tumor 1)  
326 was found to be the most expressed and CRISP3 (cysteine-rich secretory protein  
327 3) was the most under-expressed gene. WT1 is a transcriptional regulatory  
328 protein essential to cellular development and cell survival, and it has been known  
329 to be highly expressed with an oncogenic role in AML<sup>38,39</sup>, in agreement with our  
330 findings. However, CRISP3's direct role in AML is still under investigation.  
331 CRISP3 is a member of the cysteine-rich secretory protein CRISP family with  
332 major role in female and male reproductive tract, and is mainly expressed in  
333 salivary gland and bone marrow<sup>40</sup>. Recently, 80 genes were reported as  
334 "extracellular matrix specific genes" in leukemia, and CRISP3 was among the  
335 downregulated DE genes reported<sup>41</sup>. CRISP3 associations with AML merit further  
336 investigation.

337

338 The enrichment analysis for GO terms of the 974 DE probe sets (Fig. 2c) results  
339 showed 727 identifiers (335 up- and 392 down-regulated) enriched for 21 GO  
340 terms. 592 of these (257 up- and 335 down-regulated) were enriched in the  
341 cellular component (CC) categories mainly associated with cytoplasm,  
342 extracellular exosome, cytosol, and extracellular space. These terms are rather  
343 generic, but may still reflect relevance to AML development and progression<sup>42,43</sup>.

344 Biological process (BP) category, GO terms included inflammatory and immune  
345 responses, and cell proliferation, which are expected as AML is characterized by  
346 terminal differentiation of normal blood cells and excessive proliferation and  
347 release of abnormally differentiated myeloid cells, and likely affects many  
348 biological processes associated to the immune system. The four statistically  
349 significant KEGG pathways identified in the pathway enrichment analysis  
350 encompassed 56 DEPS (Table 3). Transcriptional misregulation in cancer was  
351 the most up-regulated pathway in AML (13 up-regulated DE genes, while  
352 Hematopoietic cell lineage, and Cell cycle pathways were mostly down-  
353 regulated, and the p53 signaling pathway was balanced in terms of  
354 up/downregulated DE genes (Fig. 2c). The enriched pathways Fig. 2d shows the  
355 mean difference values of the 56 DE pathway-associated genes, including 27  
356 genes up- and 29 down-regulated. These KEGG pathways are known to be  
357 involved in tumorigenesis. Additionally, the majority of the associated DE genes  
358 from AML meta-analysis with the identified signaling pathways are known to be  
359 abnormally expressed in AML. These findings are consistent with findings from  
360 other studies and our current understanding of AML pathogenesis.

361

362 The DEPS overlap with the 25 genes reported by Miller and  
363 Stamatoyannopoulos that were reported in at least 8 studies<sup>21</sup>, namely HOXA10,  
364 CD34, MEIS1,VCAN, RBPMS and MN1. In terms of the genes reported in the  
365 same study for poor progression we also consistently identified as upregulated  
366 HOXA10, RBPMS, CD34, GNAI1, CLIP2, DAPK1, GUCY1A3, ANGPT1 and



367 FLT3, and as downregulated UGCG. While these are known markers, with  
368 consistent expression differences, our additional results need to be investigated  
369 further and experimentally validated, including mechanistic considerations.

370

371 *ii) Analysis 2a: Sex-dependent gene expression meta-analysis and associated*  
372 *signaling pathways in AML compared to healthy individuals*, was performed to  
373 explore the relevance of patients' sex on gene expression and to identify sex-  
374 linked genes and associated signaling pathways in AML. A total of 266 DEPS  
375 were found statistically significant in this analysis, with 70 found to overlap with  
376 the DEPS from Analysis 1 (Fig 3a-b). The top10 up- and down-regulated DE  
377 genes with respect to females include (Fig. 3c) – DDX3Y (DEAD-Box Helicase 3  
378 Y-Linked), EIF1AY (Eukaryotic Translation Initiation Factor 1A Y-Linked),  
379 KDM5D (Lysine Demethylase 5D), RPS4Y1 (Ribosomal Protein S4 Y-Linked 1)  
380 with higher expression in males compared to females, and XIST (X Inactive  
381 Specific Transcript), TSIX (TSIX Transcript, XIST Antisense RNA), and PRKX  
382 (Protein Kinase X-Linked) were as higher in females. These genes are known to  
383 be sex-specific and show such differences and sex separation within the AML  
384 and the healthy groups respectively (Fig. 3d). The role of these genes as positive  
385 controls in studies with AML needs to be investigated further. We also reported  
386 sex and AML known genes that were statistically significant in our analysis,  
387 including FLT3 and MAL.

388

389 iii) *Analysis 2b: Age-dependent gene expression meta-analysis and associated*  
390 *signaling pathways in AML compared to healthy individuals*, was carried out to  
391 identify common set of age-dependent genes and associated signaling pathways  
392 and to explore age-dependent trends in gene expression in AML. The age-  
393 dependent meta-analysis in AML using ANOVA, identified 1,395 DEPS  
394 (Bonferroni adjusted p-value <0.01). To identify age-related DEPS in AML we  
395 overlapped the 1,395 DEPS to our findings of 974 DEPS in AML disease state  
396 (Analysis 1) (Fig. 4a), and identified an overlap of 375 DEPS (Bonferroni  
397 adjusted p.value <0.01). As shown in Figure 4b, the top 10 most and least DE  
398 age-associate genes in AML according to the mean difference values in seven  
399 age-groups, including their corresponding values from AML disease state in  
400 column “AML - healthy” for comparisons. Interestingly, CRISP3 was among the  
401 down regulated genes specifically and involved in this analysis as well,  
402 specifically associated with differences in younger age groups, 20 to 49 years of  
403 age as compared to 0 to 19 age group. Other genes showing age-specific  
404 differences included HOXA3, HOXA5 and HOXA10-HOXA9, which belong to the  
405 homeobox genes (HOX) family of transcription factors, essential to embryonic  
406 development and hematopoiesis, and associated with chromosomal  
407 abnormalities translocation and over-expression in AML<sup>44,45</sup>. Also identified with  
408 age-specific DE, was ORM1, which in Analysis 1 was among the top-10 most  
409 under-expressed genes, and was also among the 70 DE genes in analysis 2a.  
410 ORM1’s direct role in AML also merits further investigation, given ORM1  
411 involvement in immunosuppression and inflammation<sup>46</sup>. Finally, we have

412 identified 75 DEPS that show association with only one age-group, exclusively  
413 from all other age-groups, suggestive of potential age-specific differential gene  
414 expression signature.

415

416 In summary, our study successfully integrated multiple datasets to perform a  
417 study of gene expression in AML, across multiple factors that included disease,  
418 sex and age considerations, and identified interesting genes, both known and not  
419 previously reported as differentially expressed in each factor. We identified 974  
420 DEPS and 4 associated significant pathways involved in AML, and 70 sex- and  
421 375 age-related DE signatures. Using the 974 DEPS, a KNN model allowed AML  
422 with 91.7% accuracy. We hope that these findings may provide additional  
423 relevant targets for further experimental mechanistic studies, and to help identify  
424 new markers and therapeutic targets for AML.

425

## 426 **METHODS**

427 The generalized workflow consisted of five main steps: i) Curation of microarray  
428 gene expression data, ii) Preprocessing of raw data files followed by batch effect  
429 correction, iii) Predictions of missing annotation data using supervised machine  
430 learning, iv) Differential gene expression analysis, and v) Gene enrichment for  
431 pathway analysis that includes gene annotation, and finally gene expression-  
432 based prediction of AML (Fig. 1a).

433

### 434 **Gene expression data curation and screening criteria.**

435 Datasets used in this study were selected from the GEO public repository,  
436 maintained by the National Center for Biotechnology Information (NCBI)<sup>47</sup>  
437 (<https://www.ncbi.nlm.nih.gov/geo/>). To facilitate speed of search and keep up-to-  
438 date with possible new and relevant datasets, as soon as they were released, a  
439 Python script was used that utilized functions from the Entrez Utilities from  
440 Biopython<sup>48</sup>. We used the script to navigate the GEO records, and download  
441 microarray gene expression datasets up to 10/18. We additionally utilized Python  
442 packages, including Pandas, NumPy, and Matplotlib for data structure, numerical  
443 computing for data processing, and data visualization respectively. We used  
444 strict inclusion criteria to maintain consistency in each dataset selection, screen  
445 for availability of both raw and meta-data annotation files provided, human  
446 samples used from untreated subjects, and that the sample source was from  
447 either bone marrow (BM) and/or peripheral blood (PB). Array platform was  
448 restricted to Affymetrix, which was found to have the most available data, and to

449 avoid cross-platform normalization issues. Inclusion criteria and the data curation  
450 workflow are illustrated in Fig. 1 a-b.

451

#### 452 **Gene expression data sets used in our analysis.**

453 The curation method is summarized in the Supplementary File 4 flowchart and in  
454 the Results section. For our analysis we included 34 age-dependent datasets  
455 from 32 different studies, 16 included AML and 18 healthy subjects respectively.  
456 From the 34 datasets, 32 were produced from Affymetrix GeneChip Human  
457 Genome U133 Plus 2.0 (GPL570) and 2 conducted on Affymetrix GeneChip  
458 Human Genome U133 Array Set (GPL96 & GPL97) arrays. Table 1 provides  
459 detailed information about each data set, including the number of samples used  
460 from each dataset, sample tissue source, as well as the total number of AML  
461 patients and healthy subjects. Two studies, GSE12417<sup>49</sup> and GSE37642<sup>50-53</sup>,  
462 were originally conducted on two different Affymetrix array types (GPL570, and  
463 GPL96 & GPL97), so each was separated into two subgroups and each  
464 subgroup was considered as individual dataset in our meta-analysis, data set  
465 GSE12417: (i) subgroup 1 included 73 BM and 5 PB samples, and (ii) subgroup  
466 2 included 160 BM and 2PB. For dataset GSE37642 (i) subgroup 1 included 140  
467 BM and (ii) subgroup 2 422 BM samples (Table 1).

468

#### 469 **Dataset annotation and preprocessing.**

470 Figure 1b outlines the workflow of our preliminary data analysis including  
471 preprocessing. For each dataset used in our analysis, raw microarray CEL files

472 were downloaded from GEO, metadata was reviewed, and the data was  
473 manually curated to guarantee that and each array, which corresponded to either  
474 an AML patient or healthy individual, was verified and correctly annotated for  
475 sample source (BM or PB), platform technology used, age, sex, and disease  
476 state (AML or healthy). Raw CEL files from individual datasets were individually  
477 pre-processed using the RMA (Robust Multi-Array Average) algorithm<sup>54-56</sup>.  
478 Datasets with mixed sample source, i.e both BM and PB, were pre-processed  
479 together irrespective of sample source. Preprocessing consisted of correction for  
480 background noise using RMA background correction on perfect match (PM) raw  
481 intensities, quantile normalization to obtain the same empirical distribution of  
482 intensities for each array, median polish summarization of probes into probe sets  
483 to estimate gene-level expression value, and logarithm base-2 transformations of  
484 gene expression values to facilitate data interpretation (normal distributions) and  
485 comparisons between arrays. Additionally, our expression data were first  
486 reduced to 44,754 probe sets that are common to and appeared in all data. Data  
487 sets were z-score standardized across all probe sets and arrays.

488

489 **Prediction of missing sex- and sample source annotations from curated**  
490 **data sets.**

491 805 arrays (802 from AML patients and 3 were healthy subjects) of curated data  
492 were not annotated for sex, while 737 arrays (all AML patients) were missing  
493 sample source information. Without these metadata, we would have to discard  
494 the data, which in turn would limit the statistical power for the study, and our

495 ability to correct for biases stemming from individual datasets<sup>22</sup>. To address this,  
496 we used supervised machine learning classifiers to predict metadata. For all  
497 prediction, we used ClassificalO<sup>37</sup>, a machine learning for classification user  
498 interface, which we recently developed, to carry out the machine learning  
499 classification analyses utilizing the sklearn package in Python<sup>57</sup>

500

501 To predict sex pre-processed data sets, 1956 arrays (including both healthy and  
502 AML), that include 44,754 probe sets and their annotated sex information were  
503 used to train logistic regression (LR) classification models, and to predict 805 sex  
504 annotations. Additionally, 2024 arrays were used to train for sample source, and  
505 the prediction was performed on 737 arrays.

506

507 The supervised machine learning LR classifier we used with the following  
508 parameters:

509

510 *random\_state = None, shuffle = True, penalty = l2, multi\_class = ovr, solver =*  
511 *liblinear, max\_iter= 100, tol = 0.0001, intercept\_scaling = 1.0, verbose = 0,*  
512 *n\_jobs = 1, C = 1.0, fit\_intercept = True, dual = False, warm\_start = False,*  
513 *class\_weight = None*

514

515 The trained models for classification of missing sex and sample source  
516 annotation from curated data achieved > 95% classification accuracy with ~ 3-5%  
517 classification errors. Confusion matrix details, model accuracy and error for

518 training and testing are presented in Supplementary Table S1 online, and results  
519 in Supplementary files 1 and 2. To account for training overfitting, we used 10-  
520 fold cross-validation on all 1,956 gene expression data arrays for training and  
521 validation.

522

### 523 **Dataset-wise correction approach for batch effects correction.**

524 Batch correction was done using a dataset-wise correction. Here we refer to the  
525 term “dataset-wise correction,” to indicate performing batch correction iteratively  
526 on one dataset at a time, against a reference set of datasets chosen to account  
527 for variability. We used this approach to account for the lack within-study healthy  
528 controls in the curated gene expression datasets. To address this issue, we used  
529 5 additional datasets the included within-study controls, GEO accessions:  
530 GSE107968, GSE68172<sup>58</sup>, GSE17054<sup>59</sup>, GSE33223<sup>60</sup>, and GSE15061<sup>61</sup> (Table  
531 1B). We refer to the latter datasets hereafter as “covariate” reference datasets,  
532 as they were as the reference datasets in the batch correction. Our approach  
533 aimed to balance/distribute the weight of batch effects exerted by each dataset,  
534 as this is dependent on the number of observations within a given dataset.  
535 Combined, the covariate reference datasets included 613 total arrays, totaling  
536 455 AML and 158 healthy controls. We used ComBat<sup>23</sup> to correct for study batch  
537 effects, as its empirical Bayes-based algorithm uses both scale and mean center  
538 based methods, providing an appropriate algorithm<sup>23</sup>. Covariate reference  
539 datasets were treated as the covariate for batch during batch correction, to  
540 improve performance in correcting for batch effects rather than biological



541 variation. After batch correction, we used principal component analysis (PCA),  
542 visualizing components in both 2 and 3 dimensions, to compare the clustering  
543 results for corrections. Covariate reference datasets were removed after the  
544 batch correction step and were not part of our downstream meta-analysis.  
545 (Supplementary Fig. S1).

546

### 547 **Gene expression meta-analysis.**

548 After batch correction step, we performed gene expression meta-analysis for  
549 differential expression on the merged datasets (34 data sets, 16 AML and 18  
550 healthy), where the expression values for all 44,754 common probe sets were  
551 aggregated. The effects of patients' age, sex, and sample source, including their  
552 pairwise interactions were investigated using an analysis of variance (ANOVA)<sup>8,62</sup>  
553 . For each gene  $i$ , where  $i=[1,\dots,44,754]$ , the gene expression probe set  $Y_i$  was  
554 modeled computationally as a linear model:

$$555 Y_i \sim (a + s + d + t) + (a:s + a:d + a:t) + (s:d + s:t) + (d:t) + \varepsilon,$$

556 where  $d$  is the disease state (AML or healthy),  $a$  is age (between 0 to 100 years),  
557  $s$  is sex (female or male),  $t$  is sample source (BM or PB), and  $\varepsilon$  is a random error  
558 term. We note that the model includes sample source and its interactions to  
559 address comparisons involving different tissues in AML and healthy subjects (BM  
560 or PB respectively).

561

562 From the ANOVA analysis, genes were deemed to be disease state statistically  
563 significant (differentially expressed) if they displayed ANOVA Bonferroni-adjusted

564 p-value < 0.01. Post-hoc analysis for significant genes was conducted for  
565 comparisons (between groups) using Tukey's Honestly Significant Difference  
566 (HSD) tests. Additionally, we performed a quantile-based effect filter, where genes  
567 were deemed to show biological effects in our analysis if they displayed mean  
568 difference values in the <5% and/or > 95% quantiles of the mean difference  
569 distributions of the binary group comparisons. Based on the post-hoc analysis,  
570 genes were deemed to be statistically significantly (up- or down-regulated) if they  
571 displayed Tukey HSD using a Bonferroni adjusted cutoff for p-value <  
572 0.01/44,754.

573

#### 574 **Functional and pathway enrichment analysis**

575 We carried our enrichment analysis for DEPS using the Database DAVID<sup>34,35</sup>, the  
576 KEGG database<sup>29-31</sup> for signaling pathways, GO terms functional annotation for  
577 over representation of biological function<sup>32,33</sup> were utilized and signaling  
578 pathways were deemed significant based on Benjamini-Hochberg adjusted p-  
579 value < 0.05.

580

#### 581 **Using a k-nearest neighbor model to predict AML**

582 Before gene expression data passed to the k-nearest neighbor (KNN) algorithm  
583 to train, gene expression signatures resulted from our meta-analysis were used  
584 to extract expression values. KNN in ClassificalO<sup>37</sup> was used to carry out this  
585 analysis. All 34 data sets (16 AML and 18 healthy) were used for training, and  
586 testing was done on all 5 covariate data sets, include AML and healthy subjects.

587 Dependent, target , and testing data files were prepared in accordance with  
588 ClassificalO<sup>37</sup> user guide. The KNN model used the following parameters  
589 (Supplementary File 3):

590

591 *random\_state = None, shuffle = True, metric = minkowski, weights = uniform,*  
592 *algorithm = auto, n\_neighbors = 5, leaf\_size = 30, n\_jobs = 1, p = 2,*  
593 *metric\_params = None*

594

595 The trained model was 98% accurate, while testing was 91.7% accurate (details  
596 of training and testing are given in Supplementary File 3.

597

#### 598 **DATA AVAILABILITY STATEMENT**

599 The datasets generated in the study, supplementary data, tables, figures and  
600 files are available online at <http://doi.org/10.5281/zenodo.1492796>

601 Datasets re-analyzed in the study are publicly available on the Gene Expression  
602 Omnibus repository, at <https://www.ncbi.nlm.nih.gov/geo/> under accessions  
603 summarized in Table 1.

604

605

606 **REFERENCES**

- 607 1 Kumar, C. C. Genetic abnormalities and challenges in the treatment of acute  
608 myeloid leukemia. *Genes Cancer* **2**, 95-107, doi:10.1177/1947601911408076  
609 (2011).
- 610 2 De Kouchkovsky, I. & Abdul-Hay, M. 'Acute myeloid leukemia: a  
611 comprehensive review and 2016 update'. *Blood Cancer J* **6**, e441,  
612 doi:10.1038/bcj.2016.50 (2016).
- 613 3 Siegel, R. L., Miller, K. D. & Jemal, A. Cancer statistics, 2018. *CA Cancer J Clin*  
614 **68**, 7-30, doi:10.3322/caac.21442 (2018).
- 615 4 Institute, N. C. SEER Cancer Stat Facts: Acute Myeloid Leukemia (Percent of  
616 New Cases by Age Group).  
617 [<https://seer.cancer.gov/statfacts/html/amyl.html>]. ((accessed 11.30.18),  
618 2011-2015).
- 619 5 Arber, D. A. *et al.* The 2016 revision to the World Health Organization  
620 classification of myeloid neoplasms and acute leukemia. *Blood* **127**, 2391-  
621 2405, doi:10.1182/blood-2016-03-643544 (2016).
- 622 6 Dohner, H. *et al.* Diagnosis and management of acute myeloid leukemia in  
623 adults: recommendations from an international expert panel, on behalf of the  
624 European LeukemiaNet. *Blood* **115**, 453-474, doi:10.1182/blood-2009-07-  
625 235358 (2010).
- 626 7 Grimwade, D. & Hills, R. K. Independent prognostic factors for AML outcome.  
627 *Hematology Am Soc Hematol Educ Program*, 385-395,  
628 doi:10.1182/asheducation-2009.1.385 (2009).
- 629 8 Dohner, H. Implication of the molecular characterization of acute myeloid  
630 leukemia. *Hematology Am Soc Hematol Educ Program*, 412-419,  
631 doi:10.1182/asheducation-2007.1.412 (2007).
- 632 9 Walter, M. J. *et al.* Acquired copy number alterations in adult acute myeloid  
633 leukemia genomes. *Proc Natl Acad Sci U S A* **106**, 12950-12955,  
634 doi:10.1073/pnas.0903091106 (2009).
- 635 10 Suela, J., Alvarez, S. & Cigudosa, J. C. DNA profiling by arrayCGH in acute  
636 myeloid leukemia and myelodysplastic syndromes. *Cytogenet Genome Res*  
637 **118**, 304-309, doi:10.1159/000108314 (2007).
- 638 11 Martelli, M. P., Sportoletti, P., Tiacci, E., Martelli, M. F. & Falini, B. Mutational  
639 landscape of AML with normal cytogenetics: biological and clinical  
640 implications. *Blood Rev* **27**, 13-22, doi:10.1016/j.blre.2012.11.001 (2013).
- 641 12 Klepin, H. D., Rao, A. V. & Pardee, T. S. Acute myeloid leukemia and  
642 myelodysplastic syndromes in older adults. *J Clin Oncol* **32**, 2541-2552,  
643 doi:10.1200/JCO.2014.55.1564 (2014).
- 644 13 Short, N. J., Rytting, M. E. & Cortes, J. E. Acute myeloid leukaemia. *Lancet* **392**,  
645 593-606, doi:10.1016/S0140-6736(18)31041-9 (2018).
- 646 14 Dohner, H., Weisdorf, D. J. & Bloomfield, C. D. Acute Myeloid Leukemia. *N Engl*  
647 *J Med* **373**, 1136-1152, doi:10.1056/NEJMra1406184 (2015).
- 648 15 Reese, N. D. & Schiller, G. J. High-dose cytarabine (HD araC) in the treatment  
649 of leukemias: a review. *Curr Hematol Malig Rep* **8**, 141-148,  
650 doi:10.1007/s11899-013-0156-3 (2013).

- 651 16 Meyers, J., Yu, Y., Kaye, J. A. & Davis, K. L. Medicare fee-for-service enrollees  
652 with primary acute myeloid leukemia: an analysis of treatment patterns,  
653 survival, and healthcare resource utilization and costs. *Appl Health Econ*  
654 *Health Policy* **11**, 275-286, doi:10.1007/s40258-013-0032-2 (2013).
- 655 17 Ferrara, F. & Schiffer, C. A. Acute myeloid leukaemia in adults. *Lancet* **381**,  
656 484-495, doi:10.1016/S0140-6736(12)61727-9 (2013).
- 657 18 Appelbaum, F. R. *et al.* Age and acute myeloid leukemia. *Blood* **107**, 3481-  
658 3485, doi:10.1182/blood-2005-09-3724 (2006).
- 659 19 Cancer Genome Atlas Research, N. *et al.* Genomic and epigenomic landscapes  
660 of adult de novo acute myeloid leukemia. *N Engl J Med* **368**, 2059-2074,  
661 doi:10.1056/NEJMoa1301689 (2013).
- 662 20 Walter, M. J. *et al.* Clonal architecture of secondary acute myeloid leukemia. *N*  
663 *Engl J Med* **366**, 1090-1098, doi:10.1056/NEJMoa1106968 (2012).
- 664 21 Miller, B. G. & Stamatoyannopoulos, J. A. Integrative meta-analysis of  
665 differential gene expression in acute myeloid leukemia. *PLoS One* **5**, e9466,  
666 doi:10.1371/journal.pone.0009466 (2010).
- 667 22 Ramasamy, A., Mondry, A., Holmes, C. C. & Altman, D. G. Key issues in  
668 conducting a meta-analysis of gene expression microarray datasets. *PLoS*  
669 *Med* **5**, e184, doi:10.1371/journal.pmed.0050184 (2008).
- 670 23 Chen, C. *et al.* Removing batch effects in analysis of expression microarray  
671 data: an evaluation of six batch adjustment methods. *PLoS One* **6**, e17238,  
672 doi:10.1371/journal.pone.0017238 (2011).
- 673 24 Pavlidis, P. Using ANOVA for gene selection from microarray studies of the  
674 nervous system. *Methods* **31**, 282-289, doi:10.1016/S1046-2023(03)00157-  
675 9 (2003).
- 676 25 Pavlidis, P. & Noble, W. S. Matrix2png: a utility for visualizing matrix data.  
677 *Bioinformatics* **19**, 295-296, doi:DOI 10.1093/bioinformatics/19.2.295  
678 (2003).
- 679 26 Mias, G. in *Mathematica for Bioinformatics: A Wolfram Language Approach to*  
680 *Omics* 193-226 (Springer International Publishing, 2018).
- 681 27 Neyman, J. & Pearson, E. S. On the use and interpretation of certain test  
682 criteria for purposes of statistical inference. Part II. *Biometrika* **20a**, 263-294,  
683 doi:DOI 10.1093/biomet/20A.3-4.263 (1928).
- 684 28 Waltman, L. & Schreiber, M. On the calculation of percentile-based  
685 bibliometric indicators. *J Am Soc Inf Sci Tec* **64**, 372-379,  
686 doi:10.1002/asi.22775 (2013).
- 687 29 Kanehisa, M., Furumichi, M., Tanabe, M., Sato, Y. & Morishima, K. KEGG: new  
688 perspectives on genomes, pathways, diseases and drugs. *Nucleic Acids Res* **45**,  
689 D353-D361, doi:10.1093/nar/gkw1092 (2017).
- 690 30 Kanehisa, M., Sato, Y., Kawashima, M., Furumichi, M. & Tanabe, M. KEGG as a  
691 reference resource for gene and protein annotation. *Nucleic Acids Research*  
692 **44**, D457-D462, doi:10.1093/nar/gkv1070 (2016).
- 693 31 Kanehisa, M. & Goto, S. KEGG: kyoto encyclopedia of genes and genomes.  
694 *Nucleic Acids Res* **28**, 27-30 (2000).
- 695 32 Ashburner, M. *et al.* Gene ontology: tool for the unification of biology. The  
696 Gene Ontology Consortium. *Nat Genet* **25**, 25-29, doi:10.1038/75556 (2000).

- 697 33 Carbon, S. *et al.* Expansion of the Gene Ontology knowledgebase and  
698 resources. *Nucleic Acids Research* **45**, D331-D338, doi:10.1093/nar/gkw1108  
699 (2017).
- 700 34 Huang, D. W., Sherman, B. T. & Lempicki, R. A. Bioinformatics enrichment  
701 tools: paths toward the comprehensive functional analysis of large gene lists.  
702 *Nucleic Acids Research* **37**, 1-13, doi:10.1093/nar/gkn923 (2009).
- 703 35 Huang, D. W., Sherman, B. T. & Lempicki, R. A. Systematic and integrative  
704 analysis of large gene lists using DAVID bioinformatics resources. *Nat Protoc*  
705 **4**, 44-57, doi:10.1038/nprot.2008.211 (2009).
- 706 36 Benjamini, Y. & Hochberg, Y. Controlling the False Discovery Rate - a Practical  
707 and Powerful Approach to Multiple Testing. *J Roy Stat Soc B Met* **57**, 289-300  
708 (1995).
- 709 37 Roushangar, R. & Mias, G. I. ClassificalO: machine learning for classification  
710 graphical user interface. *bioRxiv*, doi:10.1101/240184 (2017).
- 711 38 Hou, H. A. *et al.* WT1 mutation in 470 adult patients with acute myeloid  
712 leukemia: stability during disease evolution and implication of its  
713 incorporation into a survival scoring system. *Blood* **115**, 5222-5231,  
714 doi:10.1182/blood-2009-12-259390 (2010).
- 715 39 Ho, P. A. *et al.* Prevalence and prognostic implications of WT1 mutations in  
716 pediatric acute myeloid leukemia (AML): a report from the Children's  
717 Oncology Group. *Blood* **116**, 702-710, doi:10.1182/blood-2010-02-268953  
718 (2010).
- 719 40 Udby, L., Calafat, J., Sorensen, O. E., Borregaard, N. & Kjeldsen, L. Identification  
720 of human cysteine-rich secretory protein 3 (CRISP-3) as a matrix protein in a  
721 subset of peroxidase-negative granules of neutrophils and in the granules of  
722 eosinophils. *J Leukocyte Biol* **72**, 462-469 (2002).
- 723 41 Izzi, V. *et al.* An extracellular matrix signature in leukemia precursor cells and  
724 acute myeloid leukemia. *Haematologica* **102**, E245-E248,  
725 doi:10.3324/haematol.2017.167304 (2017).
- 726 42 Buggins, A. G. *et al.* Microenvironment produced by acute myeloid leukemia  
727 cells prevents T cell activation and proliferation by inhibition of NF-kappaB,  
728 c-Myc, and pRb pathways. *J Immunol* **167**, 6021-6030 (2001).
- 729 43 Rashidi, A. & Uy, G. L. Targeting the Microenvironment in Acute Myeloid  
730 Leukemia. *Curr Hematol Malig R* **10**, 126-131, doi:10.1007/s11899-015-  
731 0255-4 (2015).
- 732 44 Borrow, J. *et al.* The t(7;11)(p15;p15) translocation in acute myeloid  
733 leukaemia fuses the genes for nucleoporin NUP98 and class I homeoprotein  
734 HOXA9. *Nature Genetics* **12**, 159-167, doi:DOI 10.1038/ng0296-159 (1996).
- 735 45 Andreeff, M. *et al.* HOX expression patterns identify a common signature for  
736 favorable AML. *Leukemia* **22**, 2041-2047, doi:10.1038/leu.2008.198 (2008).
- 737 46 Fan, C., Stendahl, U., Stjernberg, N. & Beckman, L. Association between  
738 Orosomucoid Types and Cancer. *Oncology* **52**, 498-500 (1995).
- 739 47 Barrett, T. *et al.* NCBI GEO: archive for functional genomics data sets--update.  
740 *Nucleic Acids Res* **41**, D991-995, doi:10.1093/nar/gks1193 (2013).

- 741 48 Cock, P. J. A. *et al.* Biopython: freely available Python tools for computational  
742 molecular biology and bioinformatics. *Bioinformatics* **25**, 1422-1423,  
743 doi:10.1093/bioinformatics/btp163 (2009).
- 744 49 Metzler, K. H. *et al.* An 86-probe-set gene-expression signature predicts  
745 survival in cytogenetically normal acute myeloid leukemia. *Blood* **112**, 4193-  
746 4201, doi:10.1182/blood-2008-02-134411 (2008).
- 747 50 Li, Z. *et al.* Identification of a 24-gene prognostic signature that improves the  
748 European LeukemiaNet risk classification of acute myeloid leukemia: an  
749 international collaborative study. *J Clin Oncol* **31**, 1172-1181,  
750 doi:10.1200/JCO.2012.44.3184 (2013).
- 751 51 Herold, T. *et al.* Isolated trisomy 13 defines a homogeneous AML subgroup  
752 with high frequency of mutations in spliceosome genes and poor prognosis.  
753 *Blood* **124**, 1304-1311, doi:10.1182/blood-2013-12-540716 (2014).
- 754 52 Janke, H. *et al.* Activating FLT3 Mutants Show Distinct Gain-of-Function  
755 Phenotypes In Vitro and a Characteristic Signaling Pathway Profile  
756 Associated with Prognosis in Acute Myeloid Leukemia. *Plos One* **9**, doi:ARTN  
757 e89560  
758 10.1371/journal.pone.0089560 (2014).
- 759 53 Jiang, X. *et al.* Eradication of Acute Myeloid Leukemia with FLT3 Ligand-  
760 Targeted miR-150 Nanoparticles. *Cancer Res* **76**, 4470-4480,  
761 doi:10.1158/0008-5472.CAN-15-2949 (2016).
- 762 54 Bolstad, B. M., Irizarry, R. A., Astrand, M. & Speed, T. P. A comparison of  
763 normalization methods for high density oligonucleotide array data based on  
764 variance and bias. *Bioinformatics* **19**, 185-193 (2003).
- 765 55 Irizarry, R. A. *et al.* Summaries of Affymetrix GeneChip probe level data.  
766 *Nucleic Acids Res* **31**, e15 (2003).
- 767 56 Irizarry, R. A. *et al.* Exploration, normalization, and summaries of high  
768 density oligonucleotide array probe level data. *Biostatistics* **4**, 249-264,  
769 doi:10.1093/biostatistics/4.2.249 (2003).
- 770 57 Pedregosa, F. *et al.* Scikit-learn: Machine Learning in Python. *J Mach Learn Res*  
771 **12**, 2825-2830 (2011).
- 772 58 Schneider, V. Z., L.; Markus, R.; Fekete, N.; Schrezenmeier, H.; Erle, A. ; Lars,  
773 B.; Hofmann, S.; Götz, M.; Döhner, K.; Ihme, S.; Döhner, H.; Buske, C.; Feuring-  
774 Buske, M.; Greiner, J. Leukemic progenitor cells are susceptible to targeting  
775 by stimulated cytotoxic T cells against immunogenic leukemia-associated  
776 antigens. (2015).
- 777 59 Majeti, R. *et al.* Dysregulated gene expression networks in human acute  
778 myelogenous leukemia stem cells. *Proc Natl Acad Sci U S A* **106**, 3396-3401,  
779 doi:10.1073/pnas.0900089106 (2009).
- 780 60 Bacher, U. *et al.* Multilineage dysplasia does not influence prognosis in  
781 CEBPA-mutated AML, supporting the WHO proposal to classify these patients  
782 as a unique entity. *Blood* **119**, 4719-4722, doi:10.1182/blood-2011-12-  
783 395574 (2012).
- 784 61 Mills, K. I. *et al.* Microarray-based classifiers and prognosis models identify  
785 subgroups with distinct clinical outcomes and high risk of AML

- 786 transformation of myelodysplastic syndrome. *Blood* **114**, 1063-1072,  
787 doi:10.1182/blood-2008-10-187203 (2009).
- 788 62 Tasaki, S. *et al.* Multi-omics monitoring of drug response in rheumatoid  
789 arthritis in pursuit of molecular remission. *Nat Commun* **9**, 2755,  
790 doi:10.1038/s41467-018-05044-4 (2018).
- 791 63 Zatkova, A. *et al.* AML/MDS with 11q/MLL amplification show characteristic  
792 gene expression signature and interplay of DNA copy number changes. *Genes  
793 Chromosomes Cancer* **48**, 510-520, doi:10.1002/gcc.20658 (2009).
- 794 64 Tomasson, M. H. *et al.* Somatic mutations and germline sequence variants in  
795 the expressed tyrosine kinase genes of patients with de novo acute myeloid  
796 leukemia. *Blood* **111**, 4797-4808, doi:10.1182/blood-2007-09-113027  
797 (2008).
- 798 65 Taskesen, E. *et al.* Prognostic impact, concurrent genetic mutations, and gene  
799 expression features of AML with CEBPA mutations in a cohort of 1182  
800 cytogenetically normal AML patients: further evidence for CEBPA double  
801 mutant AML as a distinctive disease entity. *Blood* **117**, 2469-2475,  
802 doi:10.1182/blood-2010-09-307280 (2011).
- 803 66 Wouters, B. J. *et al.* Double CEBPA mutations, but not single CEBPA  
804 mutations, define a subgroup of acute myeloid leukemia with a distinctive  
805 gene expression profile that is uniquely associated with a favorable outcome.  
806 *Blood* **113**, 3088-3091, doi:10.1182/blood-2008-09-179895 (2009).
- 807 67 Figueroa, M. E. *et al.* Genome-wide epigenetic analysis delineates a  
808 biologically distinct immature acute leukemia with myeloid/T-lymphoid  
809 features. *Blood* **113**, 2795-2804, doi:10.1182/blood-2008-08-172387  
810 (2009).
- 811 68 Klein, H. U. *et al.* Quantitative comparison of microarray experiments with  
812 published leukemia related gene expression signatures. *BMC Bioinformatics*  
813 **10**, 422, doi:10.1186/1471-2105-10-422 (2009).
- 814 69 Luck, S. C. *et al.* Deregulated apoptosis signaling in core-binding factor  
815 leukemia differentiates clinically relevant, molecular marker-independent  
816 subgroups. *Leukemia* **25**, 1728-1738, doi:10.1038/leu.2011.154 (2011).
- 817 70 Opel, D. *et al.* Targeting inhibitor of apoptosis proteins by Smac mimetic  
818 elicits cell death in poor prognostic subgroups of chronic lymphocytic  
819 leukemia. *Int J Cancer* **137**, 2959-2970, doi:10.1002/ijc.29650 (2015).
- 820 71 Cao, Q. *et al.* BCOR regulates myeloid cell proliferation and differentiation.  
821 *Leukemia* **30**, 1155-1165, doi:10.1038/leu.2016.2 (2016).
- 822 72 Li, L. *et al.* Altered hematopoietic cell gene expression precedes development  
823 of therapy-related myelodysplasia/acute myeloid leukemia and identifies  
824 patients at risk. *Cancer Cell* **20**, 591-605, doi:10.1016/j.ccr.2011.09.011  
825 (2011).
- 826 73 Warren, H. S. *et al.* A genomic score prognostic of outcome in trauma  
827 patients. *Mol Med* **15**, 220-227, doi:10.2119/molmed.2009.00027 (2009).
- 828 74 Karlovich, C. *et al.* A longitudinal study of gene expression in healthy  
829 individuals. *BMC Med Genomics* **2**, 33, doi:10.1186/1755-8794-2-33 (2009).



- 830 75 Kong, S. W. *et al.* Characteristics and predictive value of blood transcriptome  
831 signature in males with autism spectrum disorders. *PLoS One* **7**, e49475,  
832 doi:10.1371/journal.pone.0049475 (2012).
- 833 76 Sharma, S. M. *et al.* Insights in to the pathogenesis of axial  
834 spondyloarthritis based on gene expression profiles. *Arthritis Res Ther*  
835 **11**, R168, doi:10.1186/ar2855 (2009).
- 836 77 Rosell, A. *et al.* Brain perihematoma genomic profile following spontaneous  
837 human intracerebral hemorrhage. *PLoS One* **6**, e16750,  
838 doi:10.1371/journal.pone.0016750 (2011).
- 839 78 Schmidt, S. *et al.* Identification of glucocorticoid-response genes in children  
840 with acute lymphoblastic leukemia. *Blood* **107**, 2061-2069,  
841 doi:10.1182/blood-2005-07-2853 (2006).
- 842 79 Tasaki, S. *et al.* Multiomic disease signatures converge to cytotoxic CD8 T  
843 cells in primary Sjogren's syndrome. *Ann Rheum Dis* **76**, 1458-1466,  
844 doi:10.1136/annrheumdis-2016-210788 (2017).
- 845 80 Leday, G. G. R. *et al.* Replicable and Coupled Changes in Innate and Adaptive  
846 Immune Gene Expression in Two Case-Control Studies of Blood Microarrays  
847 in Major Depressive Disorder. *Biol Psychiatry* **83**, 70-80,  
848 doi:10.1016/j.biopsych.2017.01.021 (2018).
- 849 81 Shamir, R. *et al.* Analysis of blood-based gene expression in idiopathic  
850 Parkinson disease. *Neurology* **89**, 1676-1683,  
851 doi:10.1212/WNL.0000000000004516 (2017).
- 852 82 Clelland, C. L. *et al.* Utilization of never-medicated bipolar disorder patients  
853 towards development and validation of a peripheral biomarker profile. *PLoS*  
854 *One* **8**, e69082, doi:10.1371/journal.pone.0069082 (2013).
- 855 83 Ducreux, J. *et al.* Interferon alpha kinoid induces neutralizing anti-interferon  
856 alpha antibodies that decrease the expression of interferon-induced and B  
857 cell activation associated transcripts: analysis of extended follow-up data  
858 from the interferon alpha kinoid phase I/II study. *Rheumatology (Oxford)* **55**,  
859 1901-1905, doi:10.1093/rheumatology/kew262 (2016).
- 860 84 Lauwerys, B. R. *et al.* Down-regulation of interferon signature in systemic  
861 lupus erythematosus patients by active immunization with interferon alpha-  
862 kinoid. *Arthritis Rheum* **65**, 447-456, doi:10.1002/art.37785 (2013).
- 863 85 Xiao, W. *et al.* A genomic storm in critically injured humans. *J Exp Med* **208**,  
864 2581-2590, doi:10.1084/jem.20111354 (2011).
- 865 86 Zhou, B. *et al.* Analysis of factorial time-course microarrays with application  
866 to a clinical study of burn injury. *Proc Natl Acad Sci U S A* **107**, 9923-9928,  
867 doi:10.1073/pnas.1002757107 (2010).
- 868

869

## 870 **ACKNOWLEDGEMENTS**

871 R.R. has been supported by The Paul and Daisy Soros Fellowship for New  
872 Americans. G.I.M. and research reported in this publication have been supported  
873 by a Jean P. Schultz Endowed Biomedical Research Fund award, and by  
874 NIH/NHGRI Grant HG0006785. The content is solely the responsibility of the  
875 authors and does not necessarily represent the official views of the National  
876 Institutes of Health and other funders.

877

## 878 **AUTHOR CONTRIBUTIONS STATEMENT**

879 R.R. and G.I.M. wrote the main manuscript text and prepared the figures. All  
880 authors reviewed the manuscript.

881

## 882 **ADDITIONAL INFORMATION**

883 **Competing interests.** G.I.M. has consulted for Colgate-Palmolive North America  
884 and received compensation. R.R. declares no potential conflict of interest.

885

## 886 **FIGURE LEGENDS**

887 **Figure 1. General approach, data curation, and analysis workflow summary.**

888 The flowchart shows in **(a)** the five main steps that summarize our method of  
889 approach for our study, and in **(b)** the curation and screening criteria for raw  
890 gene expression and annotation data files curation, data pre-processing,  
891 supervised machine learning for missing metadata prediction, and batch effects  
892 correction. **(c)** The meta-analysis included a linear model analysis of variance

893 (ANOVA) coupled Tukey's Honestly Significant Difference (HSD) post-hoc tests,  
894 and KEGG pathway and GO enrichment. Finally, we performed a machine  
895 learning classification of AML based on our findings.

896

897 **Figure 2: Functional classification of DEPS from AML meta-analysis and**

898 **associated KEGG and GO enrichment analysis.** For all panels, normalized

899 values are represented in with blue for down-regulation and red for up-regulation,

900 while light red/gray represents no reported specific direction. **(a)** Heatmap of 974

901 DEPS (rows) on 2,761 arrays (columns) including 2213 AML patients and 548

902 healthy individuals from AML meta-analysis, using unsupervised hierarchical

903 clustering and Euclidean distance for clustering. The age of each individual is

904 displayed at the bottom and illustrated in the color bar on the top (dark green for

905 young and yellow for old). The disease state (AML vs healthy), sex of each

906 subject and age-groups are represented in color bars on the top. **(b)** Horizontal

907 barplot of the top 10 DEPS (gene symbols on vertical axis) from AML meta-

908 analysis with mean difference values between AML and healthy (horizontal axis).

909 Enrichment analysis identified 4 KEGG signaling pathways **(c)** for our AML

910 DEPS, also visualized as a heatmap **(d)** of DEPS mean difference values

911 between AML and healthy DEPS (rows) identified in these 4 KEGG signaling

912 pathways (columns). The GO enrichment analysis results are summarized in **(e)**.

913

914 **Figure 3: Sex-related gene expression meta-analysis in AML. (a).** The

915 heatmap of mean difference values comparison between the 70 DE overlapping

916 genes between Analysis 1 and Analysis 2a. **(b)** Heatmap the 70 DEPS

917 expression (rows) on 2,761 arrays (columns) including 2213 AML patients and  
918 548 healthy individuals from Analysis 2a of sex-relevance in AML (using  
919 unsupervised hierarchical clustering and Euclidean distance for clustering). The  
920 disease state (AML vs healthy) and sex of each subject are indicated in color  
921 bars at the top. **(c)**. Horizontal barplot of the top 10 DEPS (gene symbols on  
922 vertical axis), with the mean difference values between male-female (horizontal  
923 axis). **(d)**. Enrichment analysis for statistically significant overrepresented  
924 biological GO terms on the 70 DE genes.

925

926 **Figure 4: Age-related gene expression meta-analysis in AML. (a)** The top 10  
927 up- and down- regulated DEPS overlapping AML and age-related analyses. 75  
928 DEPS specific to a single age-group comparison, **(b)**. **(c)** The mean difference of  
929 25 DEPS with respect to the 0-19 baseline across all other groups are plotted to  
930 illustrate changes with aging. We note that the mean difference values between  
931 AML and healthy cohorts are shown in the right-most column of panes **(a)-(c)** for  
932 reference comparisons. **(d)** Overlaps over KEGG pathways of 17 DE genes  
933 identified in 4 KEGG pathways according to age groups.

934 **Table 1: Summary table of all 34 gene expression datasets used in this**  
 935 **study.**

| Author, Year                                                                      | GEO accession          | Disease Status*         | Affymetrix platform id: Number of samples used & Sample source* | Refs.                  |          |                   |          |
|-----------------------------------------------------------------------------------|------------------------|-------------------------|-----------------------------------------------------------------|------------------------|----------|-------------------|----------|
| Zatkova et al, 2009                                                               | GSE10258               | AML                     | GPL570: 8 BM                                                    | 63                     |          |                   |          |
| Tomasson et al, 2008                                                              | GSE10358               | AML                     | GPL570: 300 BM                                                  | 64                     |          |                   |          |
| Metzeler et al, 2008                                                              | GSE12417               | AML                     | GPL570: 73 BM & 5 PB<br>GPL96/97: 160 BM & 2PB                  | 49                     |          |                   |          |
| Wouters et al, 2009,<br>Taskesen et al, 2011                                      | GSE14468               | AML                     | GPL570: 482 BM & 43 PB                                          | 65,66                  |          |                   |          |
| Figuerola et al, 2009                                                             | GSE14479               | AML                     | GPL570: 16 BM                                                   | 67                     |          |                   |          |
| Klein et al, 2009                                                                 | GSE15434               | AML                     | GPL570: 231 BM & 20 PB                                          | 68                     |          |                   |          |
| Lück et al, 2011                                                                  | GSE29883               | AML                     | GPL570: 10 BM & 2 PB                                            | 69                     |          |                   |          |
| Li et al, 2013,<br>Herold et al, 2014,<br>Janke et al, 2014,<br>Jiang et al, 2016 | GSE37642               | AML                     | GPL570: 140 BM<br>GPL96/97: 422 BM                              | 50-53                  |          |                   |          |
| Bullinger et al, 2014                                                             | GSE39363               | AML                     | GPL570: 11 BM & 2 PB                                            | NYP                    |          |                   |          |
| Opel et al, 2015                                                                  | GSE46819               | AML                     | GPL570: 8 BM & 4 PB                                             | 70                     |          |                   |          |
| TCGA et al, 2015                                                                  | GSE68833               | AML                     | GPL570: 183 BM                                                  | NYP                    |          |                   |          |
| Cao et al, 2016                                                                   | GSE69565               | AML                     | GPL570: 12 PB                                                   | 71                     |          |                   |          |
| Bohl et al, 2016                                                                  | GSE84334               | AML                     | GPL570: 25 BM & 20 PB                                           | NYP                    |          |                   |          |
| Li et al, 2011                                                                    | GSE23025               | AML                     | GPL570: 21 BM & 13 PB                                           | 72                     |          |                   |          |
| Warren et al, 2009                                                                | GSE11375               | Healthy                 | GPL570: 26 PB                                                   | 73                     |          |                   |          |
| Green et al, 2009                                                                 | GSE14845               | Healthy                 | GPL570: 1 PB                                                    | NYP                    |          |                   |          |
| Wu et al, 2012                                                                    | GSE15932               | Healthy                 | GPL570: 8 PB                                                    | NYP                    |          |                   |          |
| Karlovich et al, 2009                                                             | GSE16028               | Healthy                 | GPL570: 22 PB                                                   | 74                     |          |                   |          |
| Krug et al, 2011                                                                  | GSE17114               | Healthy                 | GPL570: 14 PB                                                   | NYP                    |          |                   |          |
| Kong et al, 2012                                                                  | GSE18123               | Healthy                 | GPL570: 17 PB                                                   | 75                     |          |                   |          |
| Sharma et al, 2009                                                                | GSE18781               | Healthy                 | GPL570: 25 PB                                                   | 76                     |          |                   |          |
| Rosell et al, 2011                                                                | GSE25414               | Healthy                 | GPL570: 12 PB                                                   | 77                     |          |                   |          |
| Schmidt et al, 2006                                                               | GSE2842                | Healthy                 | GPL570: 2 PB                                                    | 78                     |          |                   |          |
| Meng et al, 2015                                                                  | GSE71226               | Healthy                 | GPL570: 3 PB                                                    | NYP                    |          |                   |          |
| Tasaki et al, 2017                                                                | GSE84844               | Healthy                 | GPL570: 30 PB                                                   | 79                     |          |                   |          |
| Leday et al, 2018                                                                 | GSE98793               | Healthy                 | GPL570: 64 PB                                                   | 80                     |          |                   |          |
| Shamir et al, 2017                                                                | GSE99039               | Healthy                 | GPL570: 121 PB                                                  | 81                     |          |                   |          |
| Tasaki et al, 2018                                                                | GSE93272               | Healthy                 | GPL570: 35 PB                                                   | 62                     |          |                   |          |
| Clelland et al, 2013                                                              | GSE46449               | Healthy                 | GPL570: 24 PB                                                   | 82                     |          |                   |          |
| Lauwerys et al, 2013<br>Ducreux et al, 2016                                       | GSE39088               | Healthy                 | GPL570: 46 PB                                                   | 83,84                  |          |                   |          |
| Xiao et al, 2011                                                                  | GSE36809               | Healthy                 | GPL570: 35 PB                                                   | 85                     |          |                   |          |
| Zhou et al, 2010                                                                  | GSE19743               | Healthy                 | GPL570: 63 PB                                                   | 86                     |          |                   |          |
| Jiang et al, 2018 <sup>#</sup>                                                    | GSE107968 <sup>*</sup> | 2 AML,<br>1 Healthy     | GPL570: 3 BM                                                    | NYP                    |          |                   |          |
| Greiner et al, 2015 <sup>#</sup>                                                  | GSE68172 <sup>*</sup>  | 20 AML,<br>5 Healthy    | GPL570: 25 PB                                                   | 58                     |          |                   |          |
| Majeti et al, 2009 <sup>#</sup>                                                   | GSE17054 <sup>*</sup>  | 9 AML,<br>4 Healthy     | GPL570: 13 BM                                                   | 59                     |          |                   |          |
| Bacher et al, 2012 <sup>#</sup>                                                   | GSE33223 <sup>*</sup>  | 20 AML,<br>10 Healthy   | GPL570: 30 PB                                                   | 60                     |          |                   |          |
| Mills et al, 2009 <sup>#</sup>                                                    | GSE15061 <sup>*</sup>  | 404 AML,<br>138 Healthy | GPL570: 542 BM                                                  | 61                     |          |                   |          |
| <b>Meta-analysis data sets summary</b>                                            |                        |                         |                                                                 |                        |          |                   |          |
| Disease state                                                                     |                        | Sample source           |                                                                 | Affymetrix platform id |          | Unique probe sets |          |
| AML                                                                               | Healthy                | BM                      | PB                                                              | GPL570                 | GPL96/97 | GPL570            | GPL96/97 |
| 2213                                                                              | 548                    | 2090                    | 671                                                             | 2177                   | 584      | 54,675            | 44,760   |

**Table 1.** A summary table of all our data sets using in our meta-analysis and disease classification.

<sup>#</sup>"Covariate reference data sets," 5 data sets that were used during the batch correction step., datasets were used only during the batch effect correction steps.

\*GEO, Gene Expression Omnibus; AML, acute myeloid leukemia; Ref. reference; NYP, not yet published, GPL570, Affymetrix Human Genome U133 Plus 2.0 Array; GPL96, Affymetrix Human Genome U133A Array; GPL97, Affymetrix Human Genome U133B Array; BM, Bone Marrow; PB, Peripheral Blood.

936  
937

**Table 2. Top 10 up- and down-regulated of DEPS in AML from disease state**

| <b>Up-regulated*</b>                                                     |                    |             |                                    |                                |
|--------------------------------------------------------------------------|--------------------|-------------|------------------------------------|--------------------------------|
| <b>DEG name</b>                                                          | <b>DEPS Symbol</b> | <b>Gene</b> | <b>Tukey's HSD Mean difference</b> | <b>Bonferroni (p-adjusted)</b> |
| Wilms tumor 1                                                            | WT1                |             | 0.255353                           | < 4.11E-11                     |
| MAM domain containing 2                                                  | MAMDC2             |             | 0.248983                           | 5.47E-09                       |
| X inactive specific transcript (non-protein coding)                      | XIST               |             | 0.230331                           | < 4.11E-11                     |
| homeobox A3                                                              | HOXA3              |             | 0.195790                           | 1.1E-06                        |
| fms-related tyrosine kinase 3                                            | FLT3               |             | 0.193420                           | < 4.11E-11                     |
| cyclin A1                                                                | CCNA1              |             | 0.185050                           | 1.35E-07                       |
| mex-3 RNA binding family member B                                        | MEX3B              |             | 0.181068                           | < 4.11E-11                     |
| collagen, type IV, alpha 5                                               | COL4A5             |             | 0.177721                           | 1.7E-05                        |
| neurexin 2                                                               | NRXN2              |             | 0.166598                           | < 4.11E-11                     |
| ATPase, Na <sup>+</sup> /K <sup>+</sup> transporting, beta 1 polypeptide | ATP1B1             |             | 0.165197                           | 5.47E-09                       |
| <b>Down-regulated</b>                                                    |                    |             |                                    |                                |
| cysteine-rich secretory protein 3                                        | CRISP3             |             | -0.51965625                        | < 4.11E-11                     |
| olfactomedin 4                                                           | OLFM4              |             | -0.489845396                       | < 4.11E-11                     |
| orosomuroid 1                                                            | ORM1               |             | -0.465232864                       | < 4.11E-11                     |
| cytochrome P450, family 4, subfamily F, polypeptide 3                    | CYP4F3             |             | -0.453467442                       | < 4.11E-11                     |
| chitinase 3-like 1 (cartilage glycoprotein-39)                           | CHI3L1             |             | -0.421520435                       | < 4.11E-11                     |
| annexin A3                                                               | ANXA3              |             | -0.390688999                       | < 4.11E-11                     |
| oxidized low density lipoprotein (lectin-like) receptor 1                | OLR1               |             | -0.35525472                        | < 4.11E-11                     |
| carcinoembryonic antigen-related cell adhesion molecule 8                | CEACAM8            |             | -0.351181264                       | < 4.11E-11                     |
| orosomuroid 1                                                            | ORM1               |             | -0.336303304                       | < 4.11E-11                     |
| tumor-associated calcium signal transducer 2                             | TACSTD2            |             | -0.323939961                       | < 4.11E-11                     |

**Table 2.** From the Post-hoc Tukey's test, gene expression means difference value < 5% or > 95% between AML and healthy (AML - healthy) were deemed statistically significant for AML. Genes were considered disease state statistically significant from the analysis of all 2761 cases (2213 AML patients and 548 healthy controls) using. The p-values were adjusted based on Bonferroni correction for false discovery rate (FDR). Significant DEPS (gene symbols) are listed in descending order of the mean difference value comparisons for disease state.

938

939 **Table 3. KEGG pathway analysis of DEPS from meta-analysis of 34 gene**  
 940 **expression datasets.**

| AML Vs Healthy DEPS and associated signaling pathways                 |               |                                                                               |                                                                                     |         |                            |
|-----------------------------------------------------------------------|---------------|-------------------------------------------------------------------------------|-------------------------------------------------------------------------------------|---------|----------------------------|
| Pathway                                                               | No. of genes* | Down-regulated                                                                | Up-regulated                                                                        | p-value | p-value Benjamini adjusted |
| Hematopoietic cell lineage                                            | 11, 6         | IL1R2, CD59, GYPA, MS4A1, EPOR, CD24, CD14, EPOR, IL1R1, MME, CR1             | ITGA4, FLT3, CD34, IL3RA, ITGA5, CD44                                               | 2.3E-5  | 5.8E-3                     |
| Cell cycle                                                            | 12, 6         | CDC7, CDC6, CCNB1, CDC20, CCNA2, CCNE2, TTK, CDC14B, CDK1, BUB1, CCNB2, BUB1B | RB1, CCNA1, CDK6, ATM, TFDP2, CDKN2A                                                | 1.4E-4  | 1.2E-2                     |
| p53 signaling pathway                                                 | 6, 7          | THBS1, CCNB1, CCNE2, CDK1, RRM2, CCNB2                                        | SIAH1, CDK6, ATM, SERPINE1, CDKN2A, PMAIP1, ZMAT3                                   | 1.0E-4  | 1.3E-2                     |
| Transcriptional misregulation in cancer                               | 7, 13         | IL1R2, GZMB, CD14, ELANE, MMP9, CEBPE, PBX1                                   | WT1, RUNX2, ETV5, MEI S1, JUP, EWSR1, ATM, HOXA10, MLF1, FLT3, CNT2, MEF2C, SLC45A3 | 6.5E-4  | 4.1E-2                     |
| AML sex relevant (male - female) DEPS & associated signaling pathways |               |                                                                               |                                                                                     |         |                            |
| Pathway                                                               | No. of genes* | High in Females                                                               | High in Males                                                                       |         |                            |
| Hematopoietic cell lineage                                            | 1, 2          | –                                                                             | FLT3, CD34                                                                          |         |                            |
| p53 signaling pathway                                                 | –, 1          | –                                                                             | PMAIP1                                                                              |         |                            |
| Transcriptional misregulation in cancer                               | –, 1          | MS4A1                                                                         | FLT3                                                                                |         |                            |

**Table 3:** Enrichment analysis was done using 974 DEPS, including KEGG enrichment analysis identified 4 statistically significant pathways from AML Vs Healthy meta-analysis, shown with overlaps with sex-specific analysis.  
 \* up and down regulated genes displayed

941

942 **Table 4. KEGG pathway analysis of DEPS from meta-analysis of 34 gene**  
 943 **expression datasets overlap with age-specific findings.**

| AML age-dependent (AML - healthy) DEPS & associated signaling pathways |               |                                                                                                                                                                                                                                                |                                                                                                                                                                                          |
|------------------------------------------------------------------------|---------------|------------------------------------------------------------------------------------------------------------------------------------------------------------------------------------------------------------------------------------------------|------------------------------------------------------------------------------------------------------------------------------------------------------------------------------------------|
| Pathway                                                                | No. of genes* | Down-regulated Age-group                                                                                                                                                                                                                       | Up-regulated Age-group                                                                                                                                                                   |
| <b>Hematopoietic lineage</b> <b>cell</b>                               | 4, 1          | CD14<br>(30 to 39) - (0 to 19)                                                                                                                                                                                                                 | FLT3<br>(20 to 29) - (0 to 19), (30 to 39) - (0 to 19),<br>(40 to 49) - (0 to 19), (50 to 59) - (0 to 19),<br>(60 to 69) - (0 to 19), (70 to 79) - (0 to 19),<br>(80 to 100) - (0 to 19) |
|                                                                        |               | MME<br>(30 to 39) - (0 to 19), (40 to 49) - (0 to 19),<br>(50 to 59) - (0 to 19)                                                                                                                                                               |                                                                                                                                                                                          |
|                                                                        |               | CD24<br>(30 to 39) - (0 to 19), (40 to 49) - (0 to 19),<br>(50 to 59) - (0 to 19)                                                                                                                                                              |                                                                                                                                                                                          |
|                                                                        |               | MS4A1<br>(40 to 49) - (0 to 19), (50 to 59) - (0 to 19),<br>(60 to 69) - (0 to 19), (70 to 79) - (0 to 19),<br>(80 to 100) - (0 to 19)                                                                                                         |                                                                                                                                                                                          |
| <b>Cell cycle</b>                                                      | 3, 2          | CCNA2<br>(50 to 59) - (0 to 19)                                                                                                                                                                                                                | CCNA1<br>(30 to 39) - (0 to 19), (40 to 49) - (0 to 19),<br>(50 to 59) - (0 to 19), (60 to 69) - (0 to 19)                                                                               |
|                                                                        |               | CDK6<br>(60 to 69) - (30 to 39)                                                                                                                                                                                                                |                                                                                                                                                                                          |
|                                                                        |               | CDC14B<br>(30 to 39) - (0 to 19), (40 to 49) - (0 to 19),<br>(50 to 59) - (0 to 19), (60 to 69) - (0 to 19),<br>(70 to 79) - (0 to 19)                                                                                                         | CDKN2A<br>(40 to 49) - (0 to 19)                                                                                                                                                         |
| <b>p53 pathway</b> <b>signaling</b>                                    | 1, 1          | CDK6<br>(60 to 69) - (30 to 39)                                                                                                                                                                                                                | CDKN2A<br>(40 to 49) - (0 to 19)                                                                                                                                                         |
| <b>Transcriptional misregulation in cancer</b> <b>in</b>               | 5, 4          | CD14<br>(30 to 39) - (0 to 19)                                                                                                                                                                                                                 | MEIS1<br>(50 to 59) - (0 to 19), (50 to 59) - (20 to 29),<br>(60 to 69) - (0 to 19), (60 to 69) - (20 to 29),<br>(70 to 79) - (0 to 19)                                                  |
|                                                                        |               | MMP9<br>(20 to 29) - (0 to 19), (30 to 39) - (0 to 19),<br>(40 to 49) - (0 to 19), (50 to 59) - (0 to 19),<br>(60 to 69) - (0 to 19), (70 to 79) - (0 to 19)                                                                                   |                                                                                                                                                                                          |
|                                                                        |               | EWSR1<br>(60 to 69) - (50 to 59),<br>(70 to 79) - (50 to 59)                                                                                                                                                                                   | WT1<br>(20 to 29) - (0 to 19), (30 to 39) - (0 to 19),<br>(40 to 49) - (0 to 19), (50 to 59) - (0 to 19),<br>(60 to 69) - (0 to 19), (70 to 79) - (0 to 19)                              |
|                                                                        |               | CEBPE<br>(20 to 29) - (0 to 19), (30 to 39) - (0 to 19),<br>(40 to 49) - (0 to 19), (50 to 59) - (0 to 19),<br>(50 to 59) - (20 to 29), (60 to 69) - (0 to 19),<br>(70 to 79) - (0 to 19), (70 to 79) - (20 to 29),<br>(80 to 100) - (0 to 19) | FLT3<br>(20 to 29) - (0 to 19), (30 to 39) - (0 to 19),<br>(40 to 49) - (0 to 19), (50 to 59) - (0 to 19),<br>(60 to 69) - (0 to 19), (70 to 79) - (0 to 19),<br>(80 to 100) - (0 to 19) |
|                                                                        |               | CCNT2<br>(60 to 69) - (30 to 39),<br>(70 to 79) - (30 to 39),<br>(60 to 69) - (50 to 59)                                                                                                                                                       | HOXA10<br>(40 to 49) - (0 to 19), (50 to 59) - (0 to 19),<br>(50 to 59) - (20 to 29), (60 to 69) - (0 to 19),<br>(60 to 69) - (20 to 29), (70 to 79) - (0 to 19)                         |

**Table 4:** Enrichment analysis was done using 974 DEPS overlapped with age-specific analysis  
 \* up and down regulated genes displayed



944

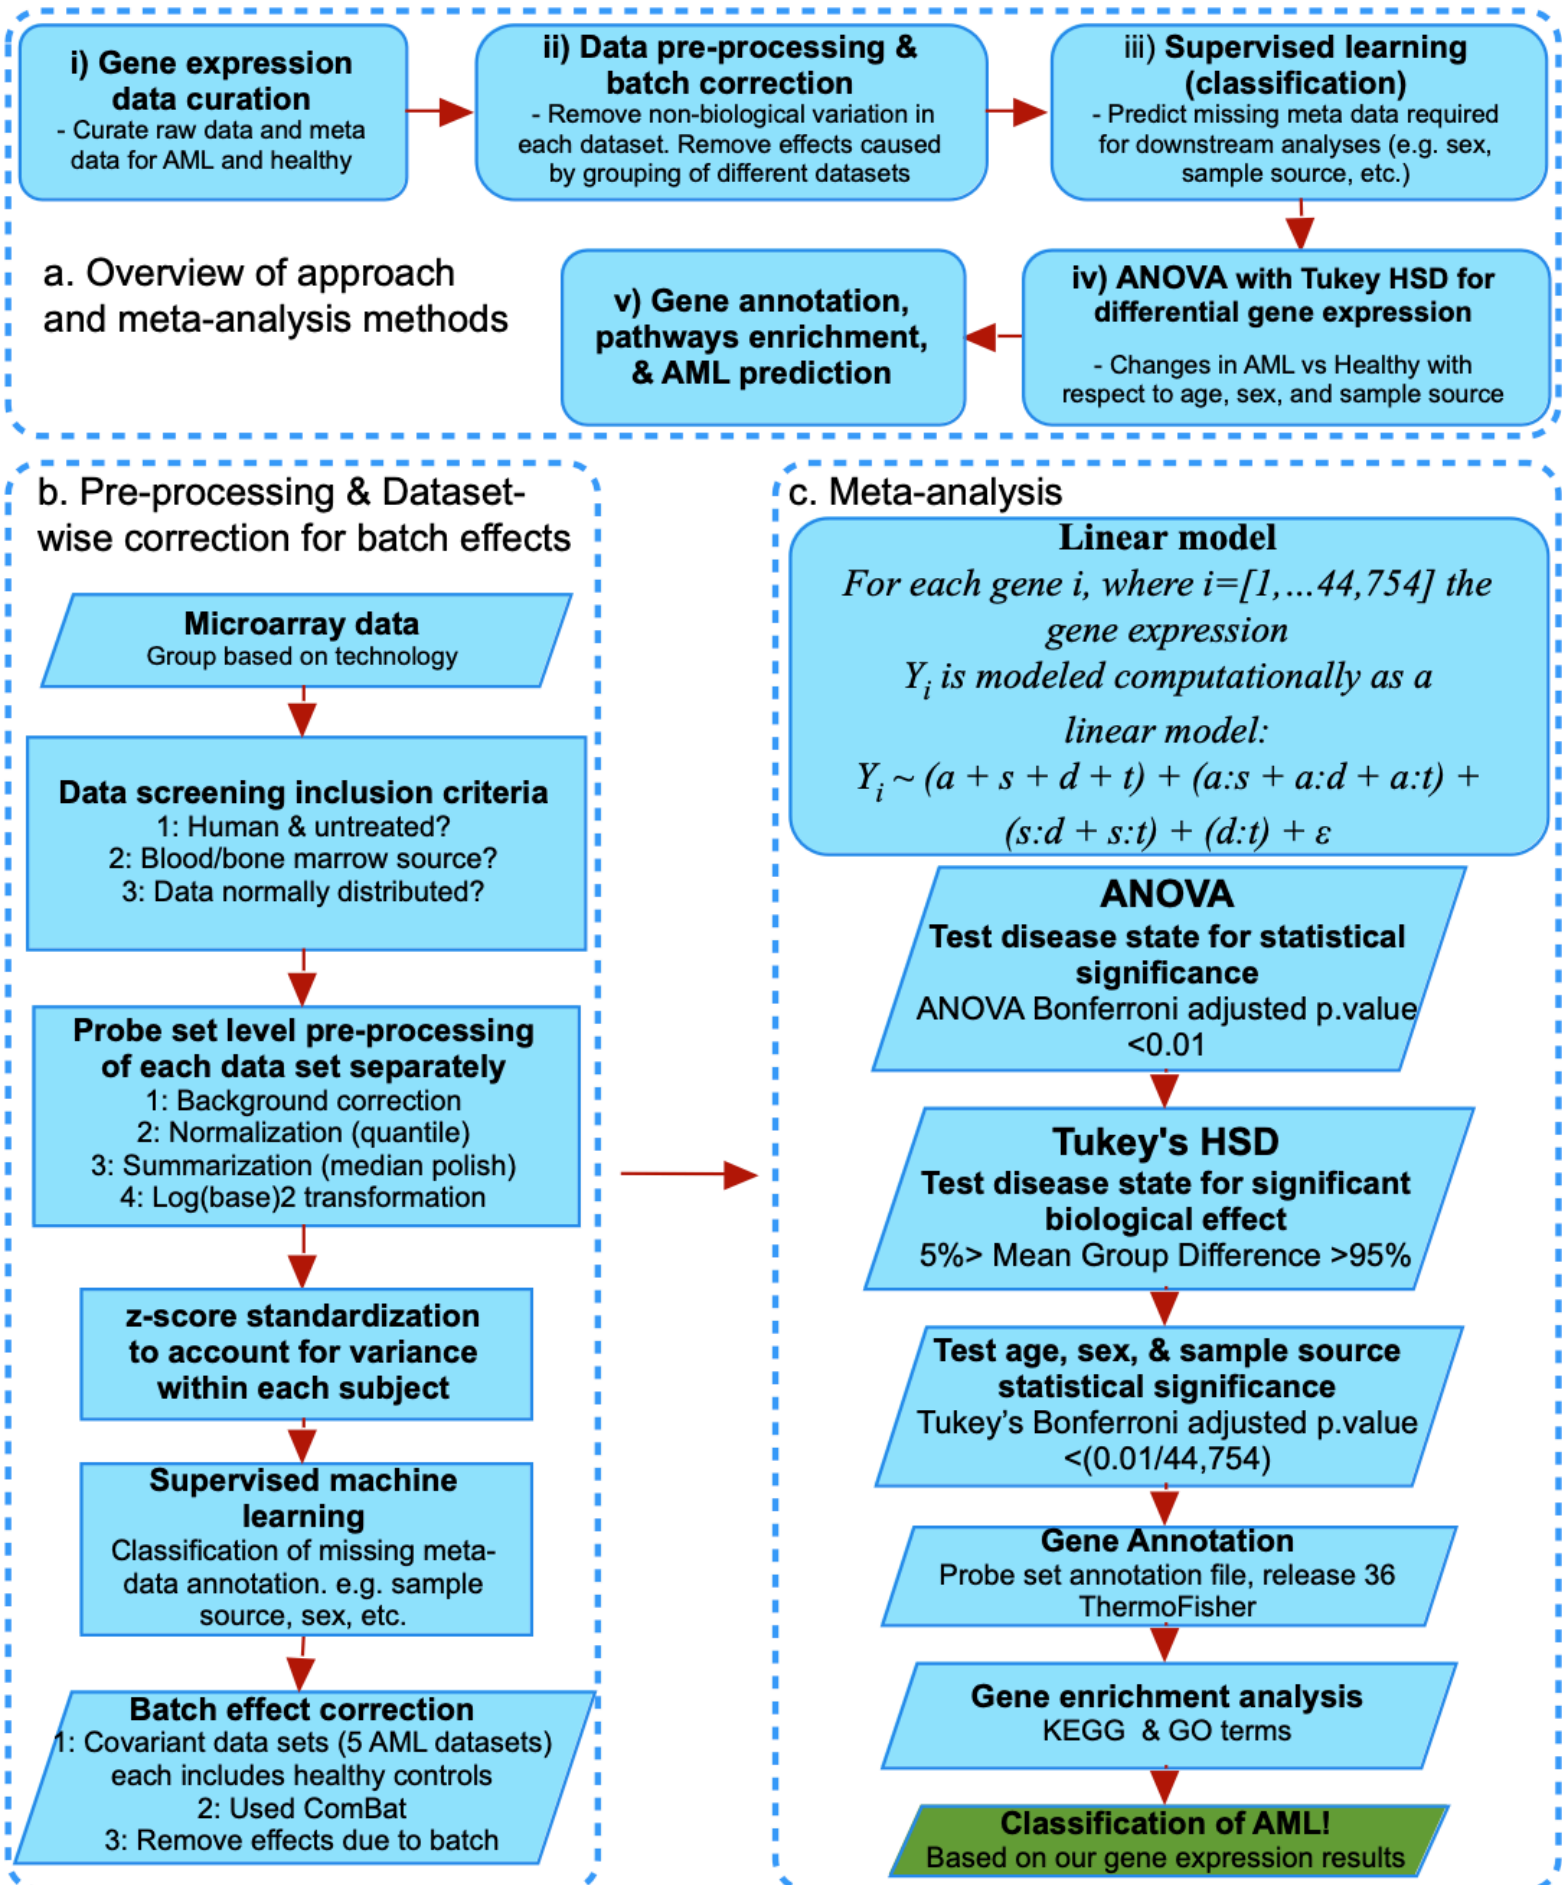

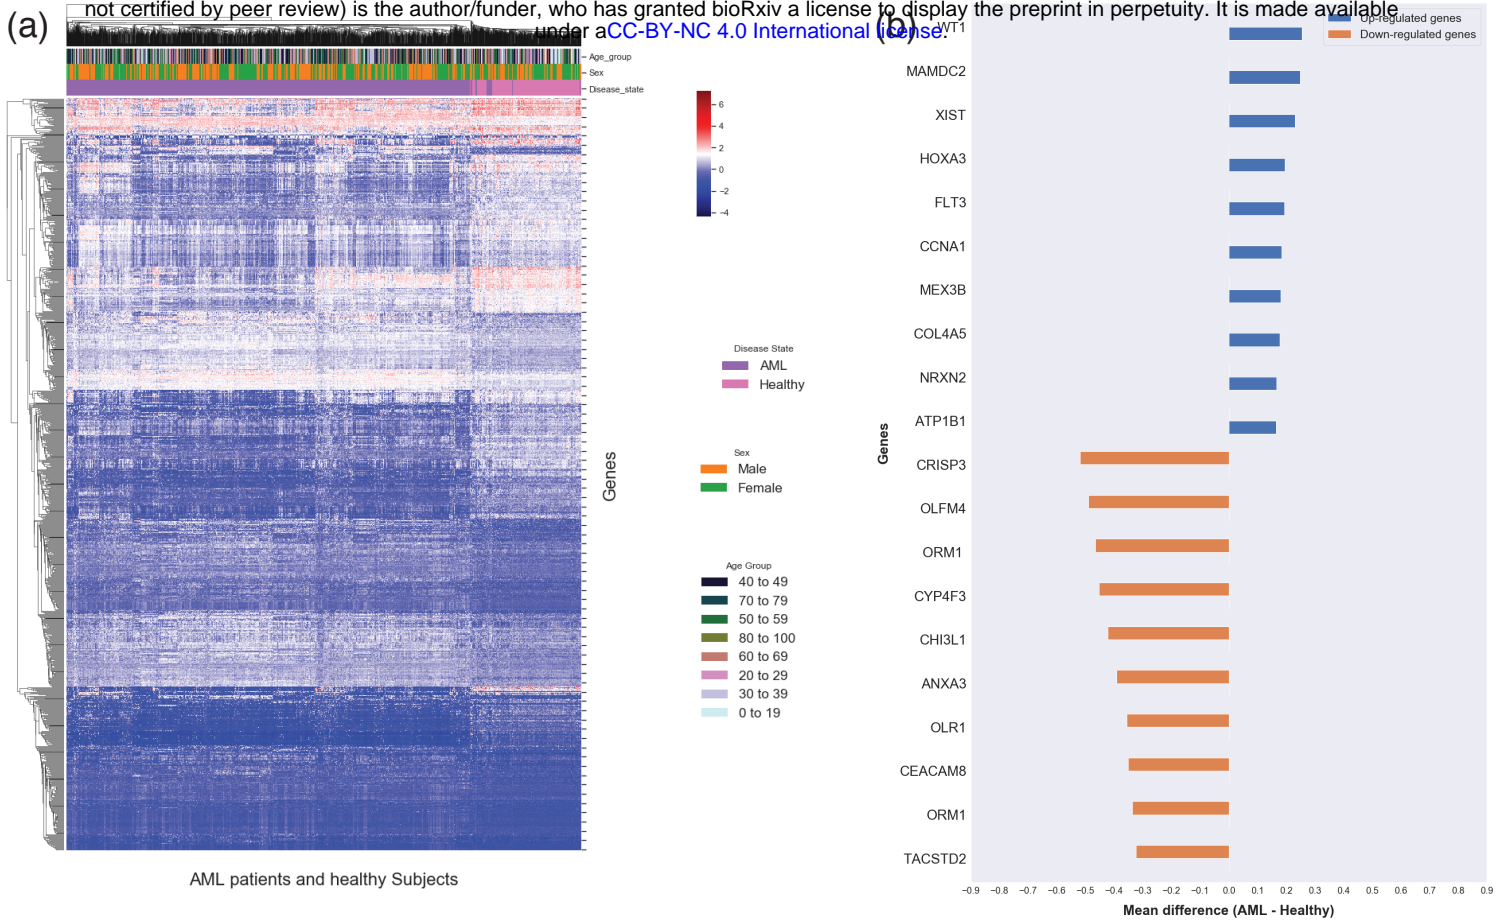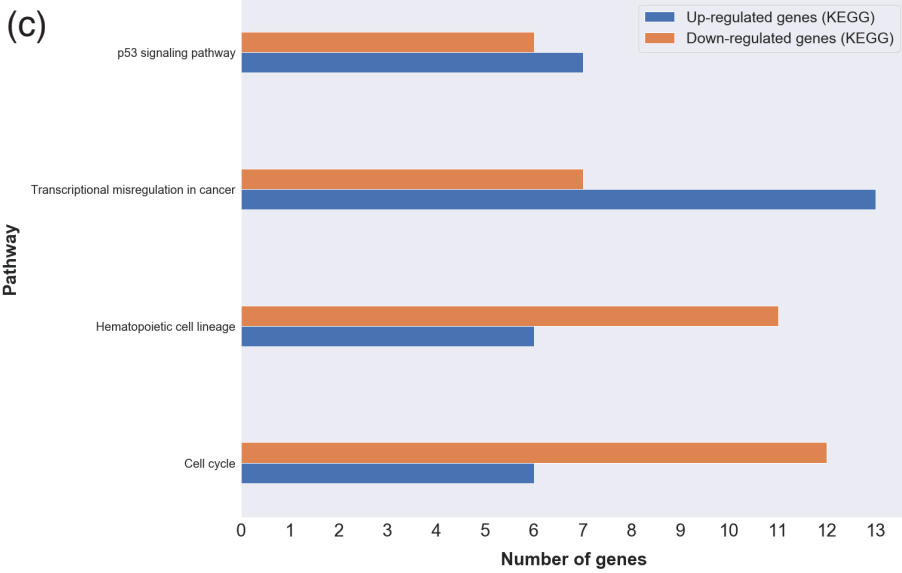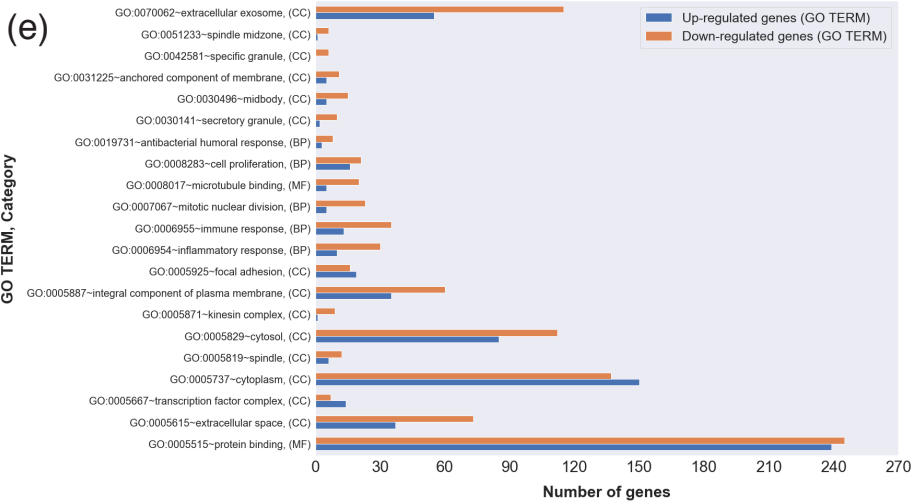

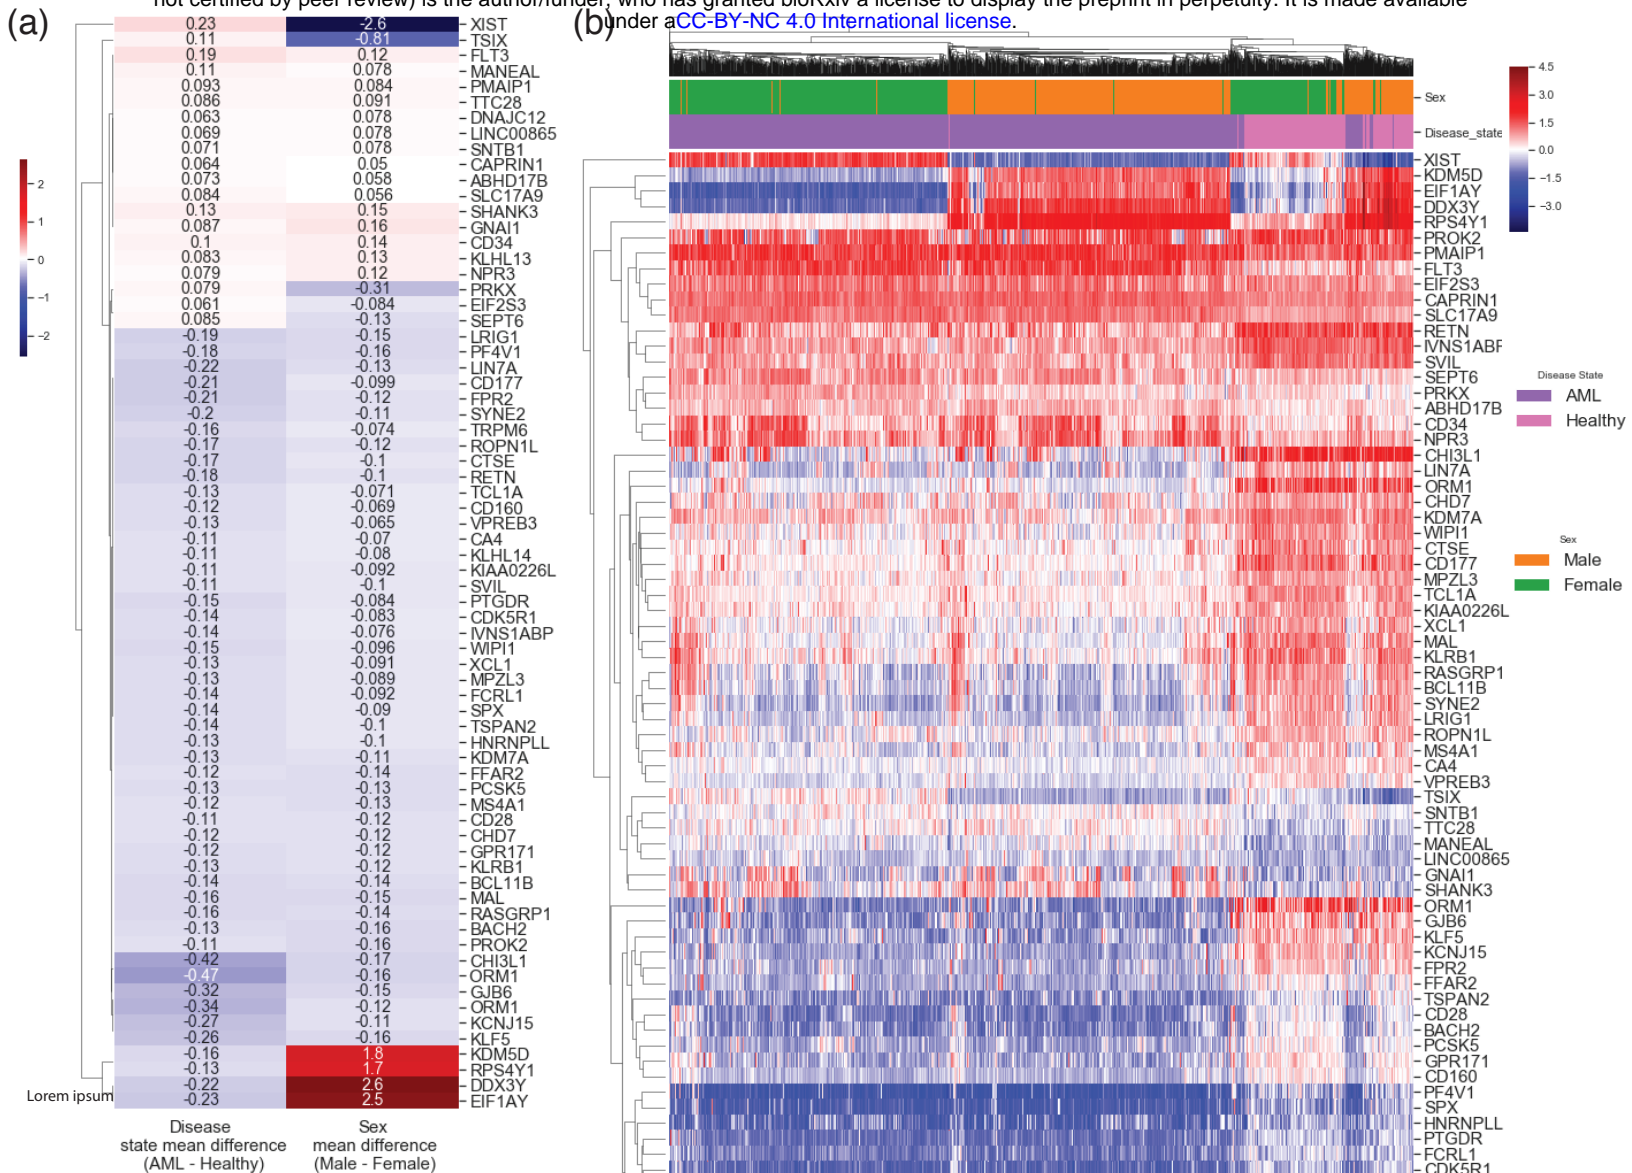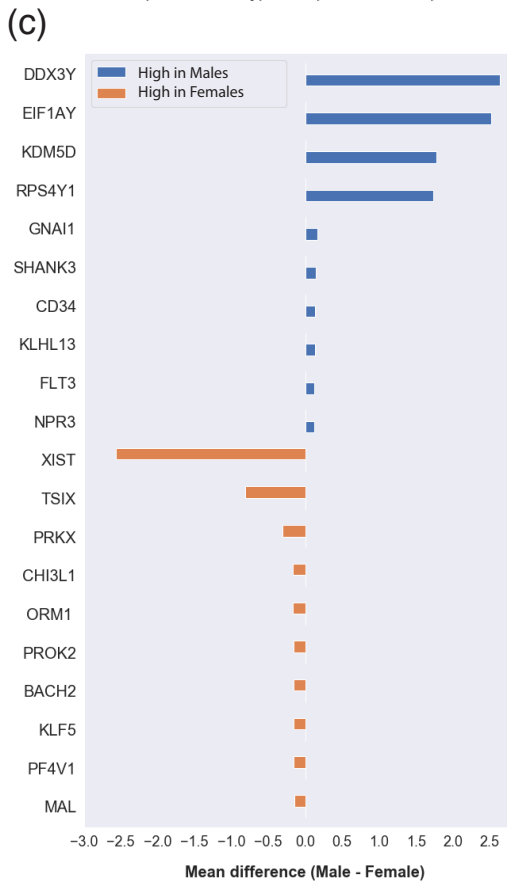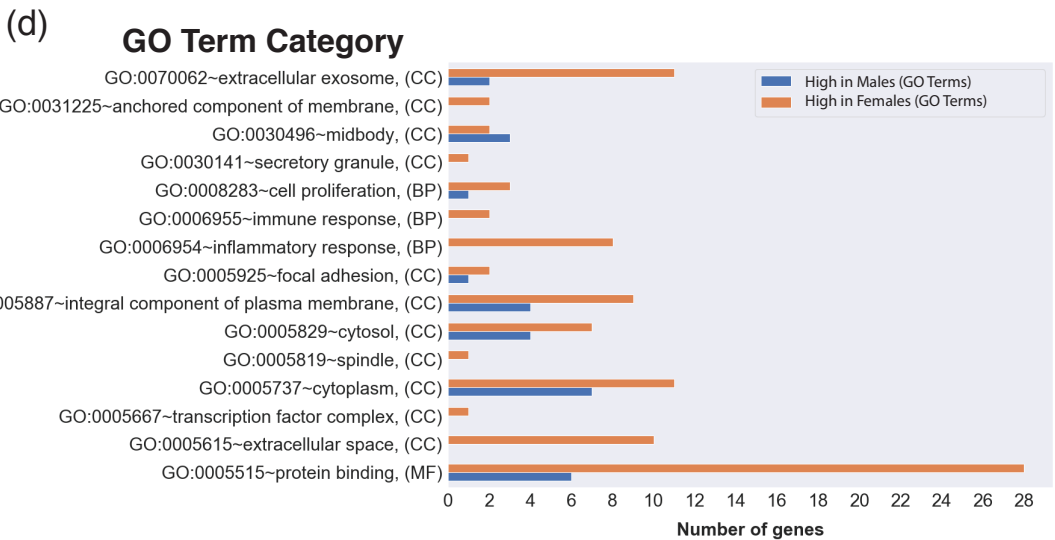

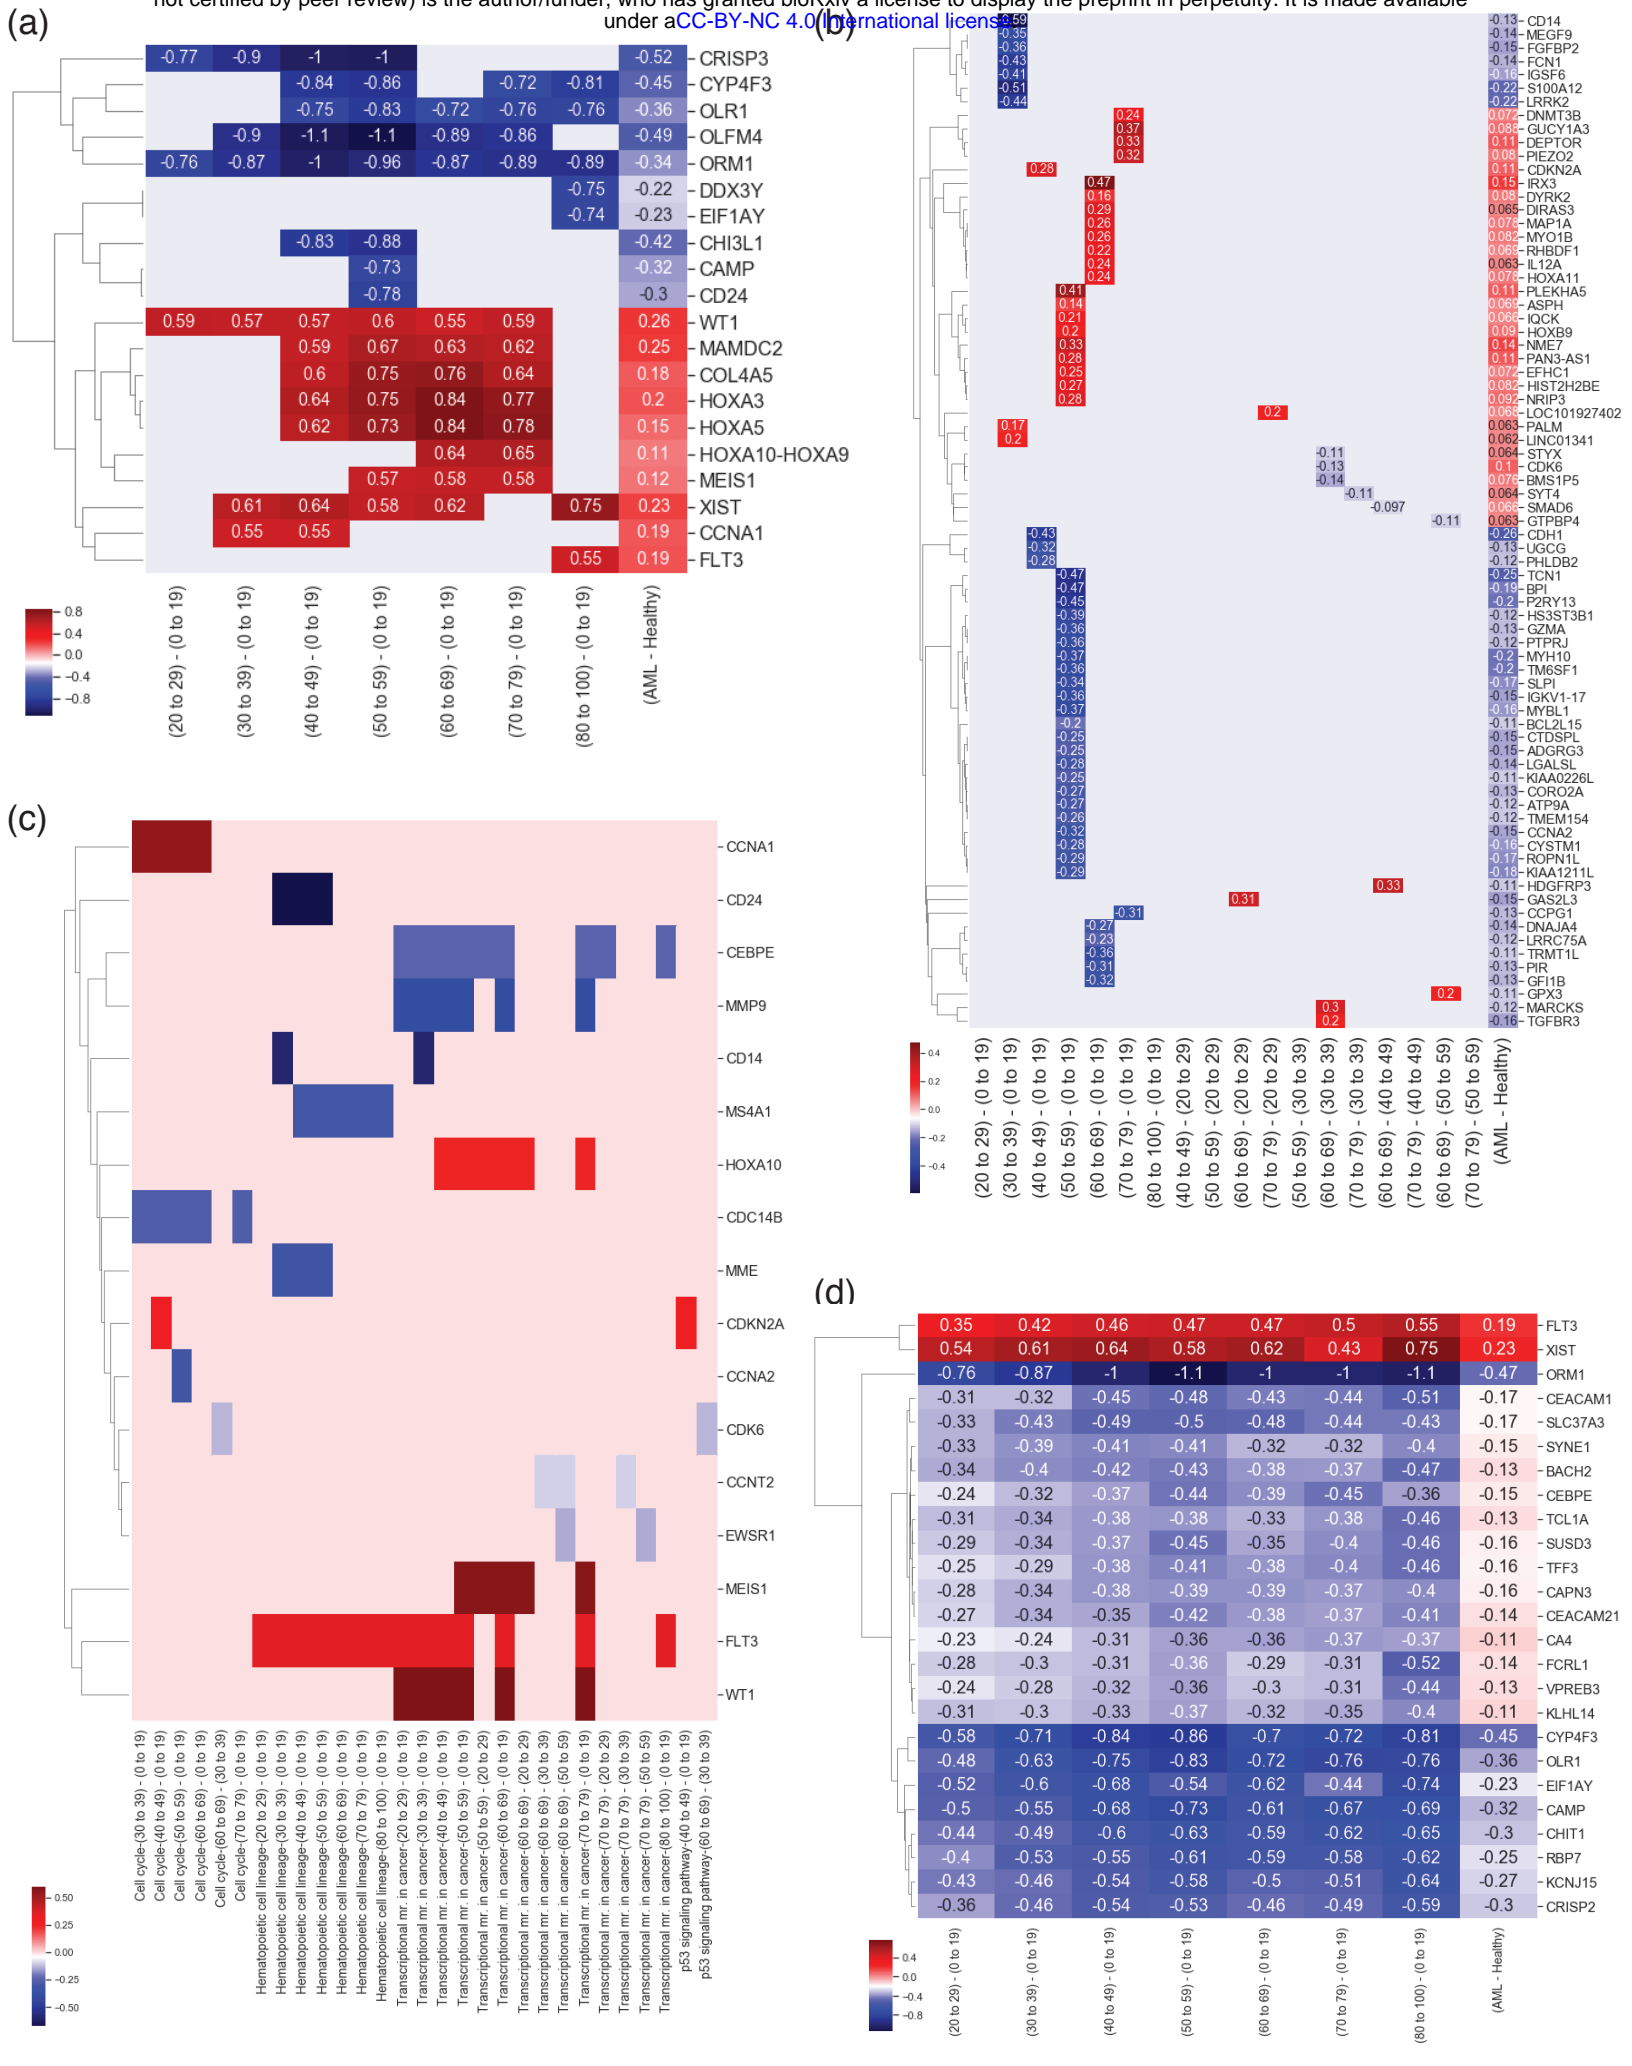

Source: http://biorxiv.org/content/10.1101/494948v1.full.pdf
